# 1 **A prebiotic basis for ATP as the universal energy currency**

2

3 Silvana Pinna<sup>1</sup>, Cécilia Kunz<sup>1</sup>, Stuart Harrison<sup>1</sup>, Sean F. Jordan<sup>1</sup>, John Ward<sup>2</sup>, Finn Werner<sup>3</sup> and Nick  
4 Lane<sup>1\*</sup>.

5

6 Silvana Pinna ORCID: 0000-0002-3680-1219

7 Stuart Harrison ORCID: 0000-000205329-7747

8 Sean F. Jordan ORCID: 0000-000108403-1100

9 John Ward ORCID: 0000-0002-4415-5544

10 Finn Werner ORCID: 0000-000203930-3821

11 Nick Lane ORCID: 0000-0002-5433-3973

12

13 <sup>1</sup>*Centre for Life's Origins and Evolution (CLOE), Department of Genetics, Evolution and Environment, University  
14 College London, Darwin Building, Gower Street, London WC1E 6BT*

15 <sup>2</sup>*Department of Biochemical Engineering University College London, London WC1E 6BT*

16 <sup>3</sup>*Institute for Structural and Molecular Biology, University College London, Darwin Building, Gower Street, London  
17 WC1E 6BT*

18

19 *\*To whom correspondence should be addressed*

20

21

## 22 Abstract

23 ATP is universally conserved as the principal energy currency in cells, driving metabolism through  
24 phosphorylation and condensation reactions. Such deep conservation suggests that ATP arose at an  
25 early stage of biochemical evolution. Yet purine synthesis requires six phosphorylation steps linked  
26 to ATP hydrolysis. This autocatalytic requirement for ATP to synthesize ATP implies the need for an  
27 earlier prebiotic ATP-equivalent, which could drive protometabolism before purine synthesis. Why  
28 this early phosphorylating agent was replaced, and specifically with ATP rather than other nucleotide  
29 triphosphates, remains a mystery. Here we show that the deep conservation of ATP reflects its  
30 prebiotic chemistry in relation to another universally conserved intermediate, acetyl phosphate,  
31 which bridges between thioester and phosphate metabolism by linking acetyl CoA to the substrate-  
32 level phosphorylation of ADP. We confirm earlier results showing that acetyl phosphate can  
33 phosphorylate ADP to ATP at nearly 20 % yield in water in the presence of  $\text{Fe}^{3+}$  ions. We then show  
34 that  $\text{Fe}^{3+}$  and acetyl phosphate are surprisingly favoured: a panel of other prebiotically relevant ions  
35 and minerals did not catalyze ADP phosphorylation; nor did a number of other potentially prebiotic  
36 phosphorylating agents. Only carbamoyl phosphate showed some modest phosphorylating activity.  
37 Critically, we show that acetyl phosphate does not phosphorylate other nucleotide diphosphates or  
38 free pyrophosphate in water. The phosphorylation of ADP monomers seems to be favoured by the  
39 interaction between the N6 amino group on the adenine ring with  $\text{Fe}^{3+}$  coupled to acetyl phosphate.  
40 Our findings suggest that the reason ATP is universally conserved across life is that its formation is  
41 chemically favoured in aqueous solution under mild prebiotic conditions.

42

## 43 Introduction

44 ATP is casually referred to as the ‘universal energy currency’ of life. Why it gained this ascendancy in  
45 metabolism, in place of many possible equivalents, is an abiding mystery in biology. There is nothing  
46 particularly special about the ‘high-energy’ phosphoanhydride bonds in ATP. Rather, its ability to  
47 drive phosphorylation or condensation reactions reflects the extraordinary disequilibrium between  
48 ATP and ADP – about 10 orders of magnitude in modern cells, pushed by free energy derived from  
49 respiration [1]. ATP drives intermediary metabolism through the coupling of exergonic to endergonic  
50 reactions via phosphorylation and hydrolysis, but other phosphorylating agents (including GTP and  
51 CTP) could be pushed equally far from equilibrium, and accomplish equivalent coupling. In fact, the  
52 centrality of ATP goes far beyond phosphorylation, as emphasised by the ubiquity of ATP derivatives  
53 in intermediary metabolism, including the ancient cofactors NADH, FADH and Coenzyme A (which all  
54 derive from ATP rather than AMP or adenine). ATP-coupled monomer activation also promotes the  
55 polymerisation of macromolecules, including RNA, DNA and proteins. Protein synthesis requires the  
56 activation of amino acids by adenylation (using ATP) before binding to tRNA, while the nucleotide  
57 triphosphates used for RNA and DNA synthesis are phosphorylated by ATP. So what, if anything, is  
58 special about ATP?

59         The most pleasing partial answer to this question is that ATP links energy metabolism with  
60 genetic information [2]. The ability to replicate RNA or DNA depends on the availability of sufficient  
61 energy to complete the task. Unlike the simple phosphorylation of intermediary metabolites, the  
62 leaving group during nucleotide polymerization is pyrophosphate (PPi) [3]. Likewise, activation of  
63 amino acids by adenylation liberates PPi as the leaving group [4–7]. The hydrolysis of PPi renders  
64 these steps exothermic, if not practically irreversible [3,8]. Only nucleotide triphosphates can release  
65 PPi while still retaining a phosphate for the sugar-phosphate backbone of RNA and DNA, or for  
66 amino-acid activation. But the fact that the canonical nucleotides can all form triphosphates, with  
67 equivalent free-energy profiles, only serves to emphasise the prominence of ATP over GTP, TTP, UTP  
68 or CTP in RNA, DNA and protein synthesis. While GTP is not uncommon in metabolic processes,  
69 including gluconeogenesis and the Krebs cycle, as well as in association with G proteins, and as the  
70 precursor of folate and pterin cofactors [9], it hardly displaces ATP from its central position in  
71 biology. Even if only one nucleotide triphosphate can be dominant, the implication of a frozen  
72 accident is not a satisfying explanation. In any case, the fact that ATP is universally conserved in the  
73 synthesis of RNA, DNA and proteins suggests it arose very early in biology, possibly even in a  
74 ‘monomer world’, before these macromolecules existed [10,11].

75         The mechanisms of ATP synthesis could give insight into why ATP is universally conserved.  
76 The ATP synthase is ancient and was most likely present in the last universal common ancestor of life

77 (LUCA) [12]. But as a rotating multi-subunit nanomotor powered by the proton-motive force, the  
78 ATP synthase is clearly a product of genes and natural selection. Because LUCA had genes and  
79 molecular machines such as ribosomes, there is no inconsistency here [13]. Yet prebiotic precursors  
80 of the ATP synthase are hard to imagine [14]. This dead-end is compounded by the inference that  
81 glycolytic ATP synthesis is less deeply conserved than chemiosmotic coupling. In bacteria and  
82 archaea, many genes in both the Embden-Meyerhof-Parnas and Entner-Doudoroff pathways are not  
83 homologous, which suggests that gluconeogenesis preceded glycolysis [15,16], and that LUCA might  
84 not have had a genetically encoded glycolytic pathway. Arguably the most plausible ancestral  
85 mechanism of ATP synthesis is through the substrate-level phosphorylation of ADP to ATP by acetyl  
86 phosphate (AcP)[14], which still acts as a bridge between thioester and phosphate metabolism in  
87 bacteria and archaea [17,18]. In modern bacteria, AcP is formed by the phosphorolysis of acetyl CoA;  
88 in archaea and eukaryotes, AcP remains bound to the active site of the enzyme, but is still formed as  
89 a transient intermediate [18]. The notion that AcP played an important role at the origin of life goes  
90 back to Lipmann [19], and has been advocated by de Duve, Ferry and House, Martin and Russell, and  
91 others [17,18,20–23]. It is at least possible to imagine the substrate-level phosphorylation of ADP to  
92 ATP by AcP in a monomer world.

93 CoA itself is derived from ATP, but simpler thioesters, with equivalent functional chemistry  
94 to acetyl CoA, have long been linked with prebiotic chemistry and the core metabolic networks in  
95 cells [13,17,19,24–30]. Recent work suggests that thioesters such as methyl thioacetate can be  
96 synthesised under hydrothermal conditions [31]. AcP can also be made in water under ambient or  
97 mild hydrothermal conditions by phosphorolysis of thioacetate which, as a thiocarboxylic acid, is  
98 even simpler than thioesters [10]. AcP will phosphorylate various nucleotide precursors in water,  
99 including ribose to ribose-5-phosphate, and adenosine to AMP [10]. Importantly, AcP will  
100 phosphorylate ADP to ATP at 20 % yield in water in the presence of Fe<sup>3+</sup> ions, suggesting that  
101 substrate-level phosphorylation could indeed take place in aqueous prebiotic conditions [32,33]. But  
102 there are also some confounding issues with AcP chemistry. Most notably, AcP acetylates amino  
103 groups, especially under alkaline conditions, which could interfere with the activation and  
104 polymerization of amino acids [10,34]. This propensity to acetylate amino acids might explain why  
105 AcP is retained in the active site of acetate kinase in archaea (and pyruvate dehydrogenase in  
106 eukaryotes) [18,35–37].

107 The discovery that AcP can phosphorylate ADP to ATP in the presence of Fe<sup>3+</sup> was  
108 serendipitous: while studying the electrolysis of ADP in the presence of AcP, Kitani *et al.* noted a ~20  
109 % conversion of ADP to ATP as the iron electrode they were using in their setup corroded [32]. But  
110 the fact that substrate-level phosphorylation of ADP to ATP can be accomplished by AcP in water

111 says nothing about whether this mechanism actually holds prebiotic relevance. We have therefore  
112 explored the phosphorylation of ADP more systematically using a range of prebiotically plausible and  
113 biologically relevant phosphorylating agents, and a panel of metal ions as possible catalysts. We find  
114 that the combination of  $\text{Fe}^{3+}$  and AcP is unique: no other metal ions or phosphorylating agents are as  
115 effective at phosphorylating ADP. Equally striking, we find that ADP is also unique: the combination  
116 of AcP and  $\text{Fe}^{3+}$  will phosphorylate ADP but not GDP, CDP, UDP or IDP, nor free pyrophosphate. We  
117 use these data and the reaction kinetics to propose a possible mechanism. Our results suggest that  
118 ATP became established as the universal energy currency in a prebiotic, monomeric world, on the  
119 basis of its unusual chemistry in water.

120

## 121 Results

### 122 $\text{Fe}^{3+}$ is unique in promoting ADP phosphorylation by acetyl phosphate

123 We analysed a panel of metal ions commonly used as cofactors in metabolism, and likely available at  
124 the origin of life, to compare their effect on the phosphorylation of ADP by AcP. We first confirmed  
125 the results of Kitani *et al.* [32,33] in demonstrating that  $\text{Fe}^{3+}$  catalyses the formation of ATP by AcP at  
126 ~15-20% yield depending on the conditions (**Fig. 1a**). We corroborated our HPLC results using  
127 MS/MS (**Fig. 1b**). Surprisingly, we found that  $\text{Fe}^{3+}$  is uniquely effective at catalysing ADP  
128 phosphorylation, at least among the large panel of metal ions we tested. FeS clusters chelated by  
129 monomeric cysteine initially seemed to produce small yields of ATP, as shown in **Fig. 1a**. However,  
130 Cys-FeS clusters are unstable and break down over hours except under strictly anoxic conditions  
131 [38]. We therefore suspected that the ATP yield actually reflected the release of  $\text{Fe}^{3+}$  into the  
132 medium. This was confirmed under more strictly anoxic conditions in an anaerobic glovebox,  
133 wherein FeS clusters failed to catalyse ATP formation (**SI Fig. 1**).

134 Metal ions that are commonly associated with ATP in metabolism, notably  $\text{Mg}^{2+}$  [39,40]  
135 failed to catalyse ATP formation either as free ions, or when coordinated by the monomeric amino  
136 acid aspartate, or in mineral form as brucite (**SI Fig. 2**). We had anticipated that chelated metal ions  
137 would show a stronger catalytic efficacy than free ions, as the coordination environment partially  
138 mimics the active site of enzymes, in this case acetate kinase or RNA polymerase (where glutamate  
139 or aspartate chelates  $\text{Mg}^{2+}$  at the active site). Brucite is a hydroxide mineral ( $\text{Mg}(\text{OH})_2$ ) with a unit-  
140 cell structure that is also reminiscent of the  $\text{Mg}^{2+}$  coordination by the carboxylate of aspartate in the  
141 RNA polymerase. Surface catalysis may play an important role in prebiotic chemistry, but in this case  
142 failed to promote ATP synthesis.  $\text{Mn}^{2+}$ , which has a similar activity to  $\text{Mg}^{2+}$  in acetate kinase [41] also  
143 failed to promote ATP synthesis.

144

## 145 **ADP phosphorylation occurs in a range of aqueous prebiotic environments**

146 We next explored the conditions under which  $\text{Fe}^{3+}$  catalyses the phosphorylation of ADP by acetyl  
147 phosphate, specifically pH, temperature, water activity and pressure. We found that the reaction is  
148 strongly sensitive to pH, and occurs most readily under mildly acidic conditions, with an optimum pH  
149 of ~5.5–6, the uncorrected default pH of the reaction (**Fig. 2a**). Slightly more acidic conditions (pH 4)  
150 suppressed the yield a little, but more alkaline conditions had a much stronger suppressive effect.  
151 ATP yield fell by around three quarters at pH 7, and collapsed to nearly zero at pH 9. While this sharp  
152 sensitivity to pH might seem at first sight limiting, in the Discussion we show that, on the contrary, it  
153 could be valuable in generating disequilibria, enabling ATP hydrolysis to power work.

154 ATP yield was less acutely sensitive to temperature, at least between 20 and 50 °C. Over 24  
155 hours, the overall ATP yield reflects both synthesis and hydrolysis. We found that 30 °C optimised  
156 yield across 24 hours, by promoting synthesis within the first 4 hours while limiting hydrolysis over  
157 the subsequent 20 hours (**Fig. 2b**). The rate of synthesis was a little lower at 20 °C, but this was  
158 offset by slightly less hydrolysis over 24 hours. ATP synthesis was markedly faster at 50 °C, but so too  
159 was hydrolysis, which already lowered yields within the first 2 hours and cut them to less than a  
160 quarter of those at 30 °C after 24 hours. If ATP is to power work, as in modern cells, then hydrolysis  
161 in itself is not an issue, but rather needs to be coupled to other reactions such as the  
162 phosphorylation or condensation of substrates. Such processes also tend to take place over minutes  
163 to hours [10], meaning that temperature has a relatively trivial effect, with the yield after 2-3 hours  
164 being similar at all three temperatures studied, at around 10-15 % (**Fig. 2b**). This implies that  
165 temperature would not be a strong limiting factor on many possible prebiotic environments.

166 More surprisingly, ATP yield was greatest at high water activity, either in HPLC-grade water  
167 or in suspended silica (**Fig. 2c**). Adding NaCl lowered ATP yield, albeit not dramatically. Moderate  
168 NaCl concentration (300 mM, giving a total reaction ionic strength of 303.75 mM) lowered ATP yield  
169 by around a fifth. Modern ocean salinity (600 mM NaCl, reaction ionic strength 603.75 mM) and  
170 higher salinity (1 M NaCl, reaction ionic strength 1.004 M) both roughly halved the yield. This  
171 suggests that the effect of solutes does not only reflect ionic strength, which was confirmed by the  
172 addition of other solutes. Dissolved silicate (10 mM  $\text{SiO}_2$ ) also halved ATP yield, even though the  
173 ionic strength in this case was only 123.75 mM (**Fig. 2c**). Likewise, higher  $\text{Mg}^{2+}$  and  $\text{Ca}^{2+}$   
174 concentrations (50 mM and 10 mM, respectively) as part of a modern ocean mix collapsed ATP  
175 yields to nearly zero (**Fig. 2c**), presumably because  $\text{Ca}^{2+}$  and  $\text{Mg}^{2+}$  promote ATP hydrolysis [42,43].  
176 While this might suggest that ATP synthesis could not occur in modern oceans,  $\text{Mg}^{2+}$  and  $\text{Ca}^{2+}$   
177 concentrations can in fact vary considerably in ocean environments (see Discussion). We show later  
178 that lower  $\text{Mg}^{2+}$  and  $\text{Ca}^{2+}$  concentrations (~2 mM) actually promote ATP synthesis.

179 High pressure (80 bar) had very little effect on ATP synthesis (**Fig. 2d**). This is consistent with  
180 the work of Leibrock, Bayer, and Lüdemann (1995), who showed that high pressure promotes ATP  
181 hydrolysis, but only at pressures  $\geq 300$  bar. The slightly greater ATP yield at ambient pressure in our  
182 experiment may be attributable to greater evaporation in the open (non-pressurized) system. This  
183 was clearly the case in the absence of  $\text{Fe}^{3+}$ , where most of the ATP detected was not produced by  
184 phosphorylation of ADP, but contamination of the ADP commercial standard via the manufacturing  
185 process, then concentrated by evaporation at ambient pressure (**SI Fig. 3**).

186

### 187 **Acetyl phosphate is more effective than other prebiotic phosphorylating agents**

188 We compared AcP with a panel of eight other potentially prebiotic phosphorylating agents, including  
189 a number still used by cells today (**Table 1**).

190

191 **Table 1 – Phosphorylating agents tested**

| Name                    | ID       | Formula                                                              | Prebiotic/biochemical prominence                                                                                                                                                                                                                                                   |
|-------------------------|----------|----------------------------------------------------------------------|------------------------------------------------------------------------------------------------------------------------------------------------------------------------------------------------------------------------------------------------------------------------------------|
| Cyclic trimetaphosphate | cTMP     | $\text{Na}_3\text{P}_3\text{O}_9$                                    | [40,45–47]                                                                                                                                                                                                                                                                         |
| Pyrophosphate           | PPi(V)   | $\text{K}_4\text{P}_2\text{O}_7$                                     | [48]                                                                                                                                                                                                                                                                               |
| Pyrophosphite           | PPi(III) | $\text{Na}_2\text{H}_2\text{P}_2\text{O}_5$                          | Has been detected in meteorites and can be generated from phosphite under hot acidic hydrothermal conditions; phosphate can be reduced to phosphite by serpentinization [49–53]                                                                                                    |
| Phosphoenolpyruvate     | PEP      | $\text{KC}_3\text{H}_5\text{O}_6\text{P}$                            | Has the highest phosphoryl-transfer potential found in living organisms ( $\Delta G^\circ = -62$ kJ/mol) [54], and is an intermediate in gluconeogenesis and glycolysis, where its conversion to pyruvic acid by pyruvate kinase generates ATP via substrate-level phosphorylation |
| Carbamoyl phosphate     | CP       | $\text{Li}_2\text{CH}_2\text{NO}_5\text{P}\cdot x\text{H}_2\text{O}$ | Can be made abiotically and has a role in extant biochemistry [55]                                                                                                                                                                                                                 |
| Trimethyl phosphate     | TMP      | $(\text{CH}_3)_3\text{PO}_4$                                         | Has been studied for its potential role in the non-enzymatic conversion of hypoxanthine to adenine [56]                                                                                                                                                                            |

192

193           Given the diverse reaction kinetics anticipated with these different phosphorylating agents,  
194 we carried out experiments at both at 30 °C (the optimal temperature for AcP) and 50 °C (as most  
195 phosphate donors are less labile than AcP and so might be more effective at higher temperatures),  
196 as well as pH 5.5–6, 7 and 9. As shown in **Fig. 3**, no other phosphorylating agent was as effective as  
197 AcP at synthesising ATP in the presence of Fe<sup>3+</sup>. The only other phosphorylating agent to show any  
198 notable efficacy was carbamoyl phosphate (CP), which is similar in structure to AcP; it has a  
199 carbamate (-CO-NH<sub>2</sub>) rather than acetate (-CO-CH<sub>3</sub>) bound to phosphate. CP produced about half the  
200 ATP yield of AcP at 20 °C and pH 5.5–6 (**Fig. 3a**), but barely a quarter of the yield at pH 7 (**Fig. 3b**). At  
201 pH 9, only cyclic trimetaphosphate (cTMP) produced any ATP at all, albeit after a delay of more than  
202 20 hours (**Fig. 3c**).

203           At 50 °C, CP generated ATP continuously over 24 hours at pH 5.5–6, despite producing only  
204 half the yield in the first 2 hours. The fact that ATP yield declined over time with AcP indicates that  
205 ATP was hydrolysed over hours at 50 °C; it was not replenished because AcP also hydrolysed at that  
206 temperature [10]. While CP has a similarly low thermal stability, the primary decomposition product  
207 is cyanate [57], which is itself a proficient condensing agent [58]. This likely contributed to a balance  
208 between the synthesis and hydrolysis of ATP over 24 hours. Only AcP formed any ATP at 50 °C and  
209 pH 7 (**Fig. 3e**), consistent with the pH sensitivity of CP seen at 30 °C. CP did form ATP at low yield at  
210 50 °C and pH 9 (**Fig. 3f**), and we can infer again that it is due to the decomposition product cyanate; .  
211 The main conclusion here is that from a panel of eight plausibly prebiotic phosphorylating agents,  
212 only AcP was capable of generating an ATP yield of > 10% in water at both 30 and 50 °C. The only  
213 other agent to show remotely comparable efficacy at mildly acidic pH was CP, but its maximal yield  
214 was half that of AcP. The fact that CP was capable of synthesising ATP at low yield under warm  
215 alkaline condition (50 °C, pH 9) in fact lowers its phosphorylating potential as it is less capable of  
216 sustaining a disequilibrium of ATP/ADP ratio in a dynamic pH environment (see Discussion).

217

### 218 **Phosphorylation of ADP to ATP is unique among nucleotide diphosphates**

219 We next explored the propensity of AcP to phosphorylate other canonical nucleotide diphosphates  
220 (NDPs), specifically cytidine diphosphate (CDP), guanosine diphosphate (GDP), uridine diphosphate  
221 (UDP) and inosine diphosphate (IDP). While not a canonical base, inosine is the precursor to both  
222 adenosine and guanosine in purine synthesis. Importantly, from a mechanistic point of view, inosine  
223 lacks the amino group incorporated at different positions onto the purine rings of adenosine and  
224 guanosine, but like GDP, IDP has an oxygen in place of the N6 amino group of adenosine. The results  
225 clearly show that AcP will phosphorylate ADP but not other NDPs (**Fig. 4a-e**), demonstrating a strong



226 dependence on the structure of the nucleobase. For all NDPs, a peak for the corresponding  
227 triphosphate was present at the start of the reaction, but this did not change over 3 hours for any  
228 NDP except ADP. As noted above for ADP, the presence of the NTP at 0 h can be ascribed to minor  
229 contamination of the commercial standard during the manufacturing process.

230 To explore the dependence of phosphorylation on the nucleobase, and to establish whether  
231  $\text{Fe}^{3+}$  interacts directly with the base as well as its diphosphate tail, ADP was substituted by potassium  
232 pyrophosphate (PPi) in the reaction mixture with AcP and  $\text{Fe}^{3+}$ . No triphosphate was detected by  $^{31}\text{P}$ -  
233 NMR (**Fig. 4f**), which suggests that the adenine ring does indeed need to interact directly with  $\text{Fe}^{3+}$ .  
234 We note that  $\text{Fe}^{3+}$  heavily interferes with  $^{31}\text{P}$ -NMR spectroscopy due to its paramagnetism. To  
235 minimize the presence of  $\text{Fe}^{3+}$  in the sample, we therefore performed solid-phase extraction twice  
236 before NMR. Despite this precaution, the experimental samples still showed some deformation,  
237 suggesting that  $\text{Fe}^{3+}$  continued to interact with the phosphate groups (**SI Fig. 4**) [59]. Nonetheless,  
238 this small deformation is cosmetic and does not conceal the absence of triphosphate in the reaction  
239 mixture. We also considered whether  $\text{Fe}^{3+}$  could interact with the adenine ring but not the  
240 diphosphate tail, analysing the phosphorylation of AMP to ADP. AcP did indeed phosphorylate AMP  
241 to ADP in the presence of  $\text{Fe}^{3+}$  (**SI Fig. 5**) but at considerably lower yield than ADP to ATP. Thus,  $\text{Fe}^{3+}$   
242 interacts preferentially with the purine ring coupled to the diphosphate tail.

243 The fact that neither pyrimidine NDP could be phosphorylated suggests that the purine ring  
244 (or at least adenosine) is essential for positioning the interactions between  $\text{Fe}^{3+}$  and AcP. ADP has an  
245 amino group at N6, whereas GDP has a carbonyl at C6 and an amino group at N2; inosine has a  
246 carbonyl group at C6; and both GDP and IDP have a protonated N at N1. We infer that the critical  
247 moiety in the adenosine ring for phosphorylation by AcP with  $\text{Fe}^{3+}$  as catalyst must be the N6-amino  
248 group of adenosine, as the IDP and GDP ring structures are equivalent elsewhere. In particular, from  
249 a mechanistic point of view, we note that the N7 is equivalent in all three purine rings, so although  
250 this might also interact with  $\text{Fe}^{3+}$ , as suggested by others [60–63], it cannot be the critical moiety.

251

### 252 **Catalysis of ADP phosphorylation does not involve nucleotide stacking**

253 To understand how  $\text{Fe}^{3+}$  catalyses the phosphorylation of ADP to ATP, we tested the effect of varying  
254 the  $\text{Fe}^{3+}$  ion concentration. Holding the ADP and AcP concentrations constant at 1 mM and 4 mM,  
255 respectively, we varied the  $\text{Fe}^{3+}$  concentration from 0.05 to 2 mM. We found that the maximal ATP  
256 yield was produced by 1 mM  $\text{Fe}^{3+}$ , indicating that the optimal ADP: $\text{Fe}^{3+}$  stoichiometry of the reaction  
257 was 1:1 (**Fig. 5a**). Following Kitani *et al.* [33] we confirmed that low concentrations of either  $\text{Mg}^{2+}$  or  
258  $\text{Ca}^{2+}$  (up to 2 mM) slightly increased the ATP yield in the presence of 1 mM  $\text{Fe}^{3+}$ . This suggests that

259 either of these divalent cations can stabilise the newly formed ATP and liberate  $\text{Fe}^{3+}$  to catalyse the  
260 next phosphorylation of ADP (**Fig. 5a**).

261 We next conducted a kinetic study of the phosphorylation reaction, specifically varying the  
262 ADP concentration and monitoring the reaction rate. The resulting curve resembled a characteristic  
263 Michaelis-Menten mechanism for an enzyme, indicating that  $\text{Fe}^{3+}$  does indeed act as a catalyst (**Fig.**  
264 **5b**). The question remained whether a single  $\text{Fe}^{3+}$  was interacting directly with a single ADP and AcP,  
265 or whether larger units such as stacked ADP rings were involved. Stacking can alter the geometry of  
266 which group interacts with  $\text{Fe}^{3+}$  (**SI Fig. 6**) and has previously been suggested as a possible  
267 mechanism[64]. However, MALDI-ToF analysis, which can sensitively detect stacked nucleotides,  
268 showed no difference between the ADP control and the reaction sample; the main visible peaks  
269 appeared to be dimers of ADP/AMP present in the commercial ADP standard, possibly due to freeze-  
270 drying during production of ADP [65] (**Fig. 5c**). This demonstrates that stacking of ADP to coordinate  
271 the  $\text{Fe}^{3+}$  ion does not occur as a mechanistic step in the reaction. That in turn constrains more tightly  
272 which groups in the base could potentially interact with metal ions such as  $\text{Fe}^{3+}$ .

273 Altogether, our results suggest that the high charge density of  $\text{Fe}^{3+}$  allows it to interact  
274 directly with the N6 amino group on the adenine ring, while anchoring AcP in position for its  
275 phosphate group to interact with the diphosphate tail of ADP, giving a taut conformation of ADP  
276 (**Fig. 6a**). The interaction with the dianion has been proposed before [66,67] and is key because at  
277 the optimal pH of 5.5–6, the first two hydroxyl groups of ADP ( $\text{pK}_a$  0.9 and 2.8) are deprotonated,  
278 while the external OH group ( $\text{pK}_a$  6.8) remains protonated, and is therefore not available for  
279 nucleophilic attack [68]. The interaction of the two deprotonated OH groups with  $\text{Fe}^{3+}$  has the effect  
280 of lowering the  $\text{pK}_a$  of the outermost OH group, thus deprotonating it and enhancing its  
281 nucleophilicity (**Fig. 6b**). The phosphate group of AcP is readily positioned for nucleophilic attack by  
282 the newly deprotonated  $\text{O}^-$  of ADP, forming ATP (**Fig. 6c**). This mechanism also explains why  $\text{Ca}^{2+}$  and  
283  $\text{Mg}^{2+}$  slightly increase the rate of reaction; these ions are able to displace  $\text{Fe}^{3+}$  from the ATP product  
284 (as they interact better with the triphosphate tail; **Fig. 6d**), freeing the  $\text{Fe}^{3+}$  to catalyse further  
285 reactions (**Fig. 6e**).

286

## 287 Discussion

288 Our results support the following conclusions: (i) acetyl phosphate (AcP) efficiently phosphorylates  
289 ADP to ATP, but only in the presence of  $\text{Fe}^{3+}$  ions as catalyst (**Fig. 1**); (ii) the reaction takes place in  
290 water and can occur in a wide range of aqueous environments (**Fig. 2**); (iii) no other phosphorylating  
291 agent tested was as effective as AcP (**Fig. 3**); and (iv) adenine is unique among canonical nucleobases  
292 in facilitating the phosphorylation of its nucleotide diphosphate to the triphosphate (**Fig. 4**). Taken

293 together, these findings suggest that the pre-eminence of ATP in biology has its roots in aqueous  
294 prebiotic chemistry. The substrate-level phosphorylation of ADP to ATP by AcP is uniquely facilitated  
295 in water under prebiotic conditions and remains the fulcrum between thioester and phosphate  
296 metabolism in bacteria and archaea today [2]. This implies that ATP became the universal energy  
297 currency of life not as the endpoint of genetic selection or some frozen accident, but for  
298 fundamental chemical reasons, and probably in a monomer world before the polymerization of RNA,  
299 DNA and proteins.

300 The work presented here provides a compelling basis for each of these statements, but also  
301 raises a number of questions. Why ferric iron? Unlike AcP or ATP itself there is no clear link with  
302 biology in this case; we had expected other ions more commonly associated with nucleotides,  
303 notably  $Mg^{2+}$  or  $Ca^{2+}$  [39,40], to play a more clear-cut role. In fact, their catalytic effect was only  
304 noticeable in the presence of  $Fe^{3+}$ , as has been reported before, whereas higher concentrations,  
305 equivalent to modern ocean conditions, precluded ATP synthesis. We infer that the reason  $Fe^{3+}$  plays  
306 a unique role relates in part to its high charge density and small ionic radius. The fact that only ADP  
307 could be phosphorylated among canonical nucleobases suggests that  $Fe^{3+}$  interacts directly with the  
308 N6 amino group on the adenine ring as well as the N7 previously noted by others [60–63]. But the  
309 interactions between  $Fe^{3+}$  and the N7 moiety alone cannot explain our results, as no triphosphate  
310 was formed in the absence of the N6-amino group, for example in the case of GDP. The fact that ADP  
311 is phosphorylated more readily than AMP (**SI Fig. 5**) indicates that  $Fe^{3+}$  also interacts with the  
312 diphosphate tail of ADP. And the fact that the optimal stoichiometry of  $Fe^{3+}$  to ADP is 1:1, coupled  
313 with the absence of evidence for stacking of bases by MALDI-ToF (**Fig. 5**), indicates that a single  $Fe^{3+}$   
314 ion interacts with a single ADP, and necessarily also with a single AcP.

315 As shown in **Fig. 6**, these stipulations require an unusually taut molecular configuration of  
316 ADP, far from the loose conformation usually depicted, if only for ease of presentation. The  
317 orientation of the adenine ring in relation to metal ions has long been disputed, with some arguing  
318 that it should face the opposite way in apposition to the phosphate tail [69]. Others have suggested  
319 an equivalent orientation to that proposed here [67,70], some specifically with  $Fe^{3+}$  [60,61]. In any  
320 case, this taut conformation almost certainly requires the interacting ion to have a high charge  
321 density and small ionic radius, to draw each of these groups into close enough proximity to react.  
322 Among the cations tested here,  $Fe^{3+}$  has the highest charge density and the smallest ionic radius  
323 [71]. Nonetheless, some of the other ions studied, notably  $Cr^{3+}$  and  $Co^{3+}$ , have a similar ionic radius  
324 and charge density, yet do not have a remotely comparable catalytic effect, so the size and charge  
325 density cannot be the only explanation for our results. The electronic configuration of  $Fe^{3+}$  may also  
326 play a role: unlike  $Cr^{3+}$  and  $Co^{3+}$ ,  $Fe^{3+}$  has the electronic configuration  $[Ar]3d^5$ , having all 5 d orbitals

327 half occupied. However,  $Mn^{2+}$ , which can substitute  $Mg^{2+}$  in the catalytic centre of acetate kinase,  
328 has an equivalent 3d orbital, yet yielded negative results in our experiments. If so, then size, charge  
329 density and electronic configuration might all play a role. These possibilities need to be explored in  
330 future work.

331 Why acetyl phosphate? The idea that this small (2-carbon) molecule might have acted as a  
332 phosphoryl donor at the origin of life has a long history, going back to Lipmann himself  
333 [10,13,17,19,24–29], as indeed does its confounding potential as an acetyl donor. Acetyl phosphate  
334 still plays a global signalling and energy transduction role in bacteria [72], in part because its free  
335 energy of hydrolysis (and therefore its phosphorylating potential) is greater than that of ATP ( $\Delta G^{\circ} =$   
336  $-43 \text{ kJ mol}^{-1}$  versus  $-31 \text{ kJ mol}^{-1}$ , respectively). When complexed in a 1:1 ratio with ADP, therefore,  
337 AcP has the potential to transfer its phosphate to form ATP, and so serves as a labile energy source  
338 in cells, linked to the excretion of acetate as waste. But the actual change in  $\Delta G$  depends on how far  
339 from equilibrium the ratio of AcP/Ac + Pi or ATP/ADP + Pi has been pushed, and hence varies  
340 depending on conditions. In our experiments, all phosphoryl donors were added at equivalent  
341 excess. The fact that the  $\Delta G^{\circ}$  for hydrolysis of PEP ( $-62 \text{ kJ mol}^{-1}$ ) and CP ( $-51 \text{ kJ mol}^{-1}$ ) are markedly  
342 greater than that for AcP means that free-energy change is only part of the explanation for the  
343 efficacy of AcP. The fact that ATP was primarily formed by AcP in the presence of  $Fe^{3+}$  ions instead  
344 implies that the critical factors were (i) the position of the two phosphoester oxygen atoms in  
345 relation to the  $Fe^{3+}$ , and (ii) the phosphate group in relation to the diphosphate tail of ADP, as shown  
346 in **Fig. 6**. In other words, both AcP and ADP are favoured not for selective or thermodynamic  
347 reasons, but kinetic – because their chemistry is facilitated by molecular geometry in aqueous  
348 prebiotic environments.

349 The only other molecule with equivalent geometry in this regard is carbamoyl phosphate  
350 (CP), which our model would therefore predict should have some phosphorylating efficacy. CP was  
351 indeed the only other species to show significant phosphorylating activity in our system (**Fig. 3**). CP  
352 has long been considered as a plausible prebiotic phosphorylating agent [55,73–75] and can also  
353 promote the formation of ATP in the presence of  $Ca^{2+}$  or  $Ba^{2+}$  ions [55,76–78]. Like AcP, CP retains a  
354 place in modern metabolism, for example as a substrate for carbamate kinase, phosphorylating ADP  
355 to ATP in microbial fermentation of arginine, agmatine, and oxalurate/allantoin [79], as well as the  
356 *de novo* synthesis of pyrimidines (although not as a phosphorylator) [80]. Taken together with our  
357 own results, these findings suggest that both AcP and CP are molecular ‘living fossils’ of prebiotic  
358 chemistry, retaining a role in modern metabolism due to their felicitous chemistry. But despite these  
359 similarities, CP was less effective than AcP at generating ATP under mildly acidic to neutral  
360 conditions (**Fig. 3**). This difference holds important connotations for its ability to power work.

361 A major question for prebiotic chemistry is how can an energy currency power work? As  
362 noted in the Introduction, there is nothing special about the bonds in ATP; rather, the ATP synthase  
363 powers a disequilibrium in the ratio of ADP to ATP, which amounts to 10 orders of magnitude from  
364 equilibrium in the cytosol of modern cells. Only that disequilibrium powers work; no equilibrium  
365 mixture of ATP and ADP can power anything. But molecular engines such as the ATP synthase use  
366 ratchet-like mechanical mechanisms to convert environmental redox disequilibria into the highly  
367 skewed ratio of ADP to ATP [81]. How could a simple prebiotic system composed of monomers  
368 sustain a disequilibrium in the ratio of ATP to ADP that powers work? One possibility is that the  
369 environment itself could sustain critical disequilibria across short distances, such as membranes. The  
370 fundamental disequilibrium that drives work in essentially all cells is the proton-motive force – at its  
371 simplest, the difference in proton concentration, or pH, across membranes. This mechanism is highly  
372 relevant to ATP, given the strong dependence of ATP synthesis versus hydrolysis on pH, specifically  
373 because the phosphorylation potential of ATP depends on its free energy of hydrolysis, which  
374 increases with pH [82,83]. Far from being an environmental limitation, the narrow pH range  
375 facilitating ATP synthesis reported here may therefore help to drive work in a monomer prebiotic  
376 world.

377 Dynamic environments such as alkaline hydrothermal systems can sustain steep pH  
378 gradients across thin inorganic barriers, as mildly acidic Hadean ocean waters (pH 5-6) continually  
379 mix with strongly alkaline hydrothermal fluids (pH 9-11) in microporous labyrinths that operate as  
380 electrochemical flow reactors [28,84–86]. We have previously shown that thin inorganic barriers  
381 containing FeS minerals such as mackinawite can sustain proton gradients as steep as 4 pH units  
382 across single 25 nm FeS nanocrystals [87]. Such steep pH gradients could in principle operate across  
383 protocells as well as inorganic barriers. Alkaline hydrothermal conditions promote the self-assembly  
384 of protocells with bilayer membranes composed of mixed amphiphiles (fatty acids and fatty  
385 alcohols) [88]). These protocells can bind to mineral surfaces, potentially exposing them to the steep  
386 pH gradients across barriers [89]. Equivalent pH gradients can drive the synthesis of organics  
387 including formate [90] and potentially thioesters [31]. The critical point is that proton flux across  
388 membranes in hydrothermal systems could promote the phosphorylation of ADP to ATP under  
389 locally acidic conditions close to the barriers, followed by hydrolysis linked to phosphorylation under  
390 more alkaline conditions in the cytosol of protocells. At face value, the ATP yield reported here at pH  
391 5-5-6 after 10 hours was 17.4 % (corresponding to 156.5  $\mu\text{M}$ ) while the yield at pH 9 was 0.043 %,  
392 corresponding to 0.4  $\mu\text{M}$ , a difference of 400-fold. Thus, a geologically sustained difference in pH  
393 across membranes could drive a local disequilibrium in the ATP/ADP ratio of 2-3 orders of  
394 magnitude, enough to power work even in the absence of other possible factors such as

395 temperature. Higher temperatures (50 °C) promote both the rapid synthesis and hydrolysis of ATP  
396 (**Fig. 2b**), which should amplify this driving force. We stress that these considerations require further  
397 elucidation, but in principle steep pH gradients can drive a disequilibrium in the ATP/ADP ratio that  
398 powers work.

399 Are these far-from-equilibrium conditions consistent with the high water-activity and low  
400 ion requirements for optimal ATP synthesis in our experiments? High concentrations of Mg<sup>2+</sup> (50  
401 mM) and Ca<sup>2+</sup> (10 mM) precluded ATP synthesis, implying that this chemistry would not be favoured  
402 in modern oceans, but would be feasible in freshwater systems. Likewise, ferrous iron could be  
403 oxidized to ferric iron by photochemical reactions or oxidants such as NO derived from volcanic  
404 emissions, meteorite impacts or lightning strikes, which also points to terrestrial geothermal systems  
405 as a plausible environment for aqueous ATP synthesis [91]. But it is less clear if steep gradients (of  
406 pH or anything else) could sustain disequilibria in ATP/ADP ratios in terrestrial geothermal systems.  
407 In any case, our results certainly do not rule out the alkaline hydrothermal systems discussed above.  
408 Some shallow submarine systems such as Strytan in Iceland are sustained by meteoritic water, and  
409 feature Na<sup>+</sup> gradients as well as H<sup>+</sup> gradients [92]; such mixed systems could have been common in  
410 shallow Hadean oceans. The concentration of divalent cations in the Hadean oceans may also have  
411 been lower than modern oceans, with estimates varying widely [40,93]. Regardless of mean ocean  
412 concentrations, strongly alkaline conditions tend to precipitate Ca<sup>2+</sup> and Mg<sup>2+</sup> ions as aragonite and  
413 brucite, so their concentration can be much lower in hydrothermal systems.

414 Ferric iron may also have been available, even in deep ferruginous oceans. Thermodynamic  
415 modelling shows that the simple mixing of alkaline hydrothermal fluids with seawater in submarine  
416 systems can promote continuous cycling between ferrous and ferric iron, potentially forming soluble  
417 hydrous ferric chlorides [94] (which our experiments show to have the same effect as ferric sulphate,  
418 **SI Fig. 7**). The availability of ferric iron is critical for other prebiotic catalysts including cysteine-FeS  
419 clusters [38,95–97] and has been discussed in more detail elsewhere [38]. Other conditions  
420 considered here, including salinity and pressure [44], have only limited effect on ATP synthesis in  
421 warm alkaline hydrothermal systems. Finally, we do not envision ATP synthesis taking place in open  
422 geochemical systems, but rather within leaky protocells composed of mixed amphiphiles [88] and  
423 capable of simple metabolic heredity [98]. Any system that can generate nucleotides will likely also  
424 form carboxylic acids such as citrate that can chelate divalent cations. We therefore consider our  
425 results to be consistent with a wide range of prebiotic aqueous environments.

426 This is not the first report of ATP synthesis at moderate yield under prebiotic conditions.  
427 What do our findings add to earlier work? We here provide an unexpected link between aqueous  
428 prebiotic chemistry and biochemistry. For example, earlier work using cyanate as a condensing agent

429 generated ATP from ADP [99,100], but cyanate also phosphorylated other nucleotide diphosphates.  
430 That was important as it showed that biologically relevant condensations are possible in water, but  
431 differed from modern biochemistry in that cyanate does not feature in extant metabolism, nor does  
432 it discriminate between bases. Cyanate therefore gives little insight into the origins of biochemistry  
433 as we know it, and specifically, the question of why ATP is the universal energy currency.

434 The work reported here shows that AcP is unique among a panel of relevant phosphorylating  
435 agents in that it can phosphorylate ADP to ATP in the presence of  $\text{Fe}^{3+}$ . AcP is formed readily through  
436 prebiotic chemistry, and remains central to prokaryotic metabolism, making it the most plausible  
437 precursor to ATP as a biochemical phosphorylator [10]. Critically important, AcP does not  
438 phosphorylate other nucleotide diphosphates, giving a compelling insight into how ATP came to be  
439 so dominant in modern metabolism. Our findings indicate that the high charge density and  
440 electronic configuration of  $\text{Fe}^{3+}$  can position molecules in water to react in the absence of  
441 macromolecular catalysts such as RNA or proteins, or even mineral surfaces. Beyond that, our results  
442 suggest that steep pH gradients could in principle generate disequilibria in the ratio of ATP to ADP of  
443 several orders of magnitude, enabling ATP to drive work even in a prebiotic monomer world. Once  
444 formed, ATP would promote intermediary metabolism through phosphorylation and as a precursor  
445 to cofactors, notably NADH, FADH and coenzyme A, while also driving the polymerization of amino  
446 acids and nucleotides to form RNA, DNA and proteins, via liberation of pyrophosphate as the leaving  
447 group. If so, then ATP became established as the universal energy currency for reasons of prebiotic  
448 chemistry, in a monomer world before the emergence of genetically encoded macromolecular  
449 engines.

450

## 451 **Materials and Methods**

### 452 **Materials**

453 All salts were purchased from Sigma-Aldrich, except for copper nitrate hemipentahydrate  
454 ( $\text{Cu}(\text{NO}_3)_2 \cdot 2.5\text{H}_2\text{O}$ ), copper sulphate pentahydrate ( $\text{CuSO}_4 \cdot 5\text{H}_2\text{O}$ ) and manganese nitrate hexahydrate  
455 ( $\text{Mn}(\text{NO}_3)_2 \cdot 6\text{H}_2\text{O}$ , Alfa Aesar), TEAA (triethylammonium acetate, Fluka), and CTP (Cytidine 5'-  
456 triphosphate sodium salt, Cambridge Bioscience). All solvents were HPLC-grade and purchased from  
457 Fischer. All reagents used were analytical grade ( $\geq 96\%$ ).

458

### 459 **Reaction setup**

460 Depending on the solubility of the analytes, reactions were carried out in either a stationary (SciQuip  
461 HP120-S) or a shaking (ThermoMix HM100-Pro) dry block heater.

462 For the reaction, stock solutions of di-nucleotides (sodium salts,  $\geq 96\%$ , Sigma-Aldrich),  
463 phosphorylating agents and metal catalyst were freshly prepared as to avoid freeze-thawing (10 mM  
464 for reactions to be analysed via HPLC, 1 M for reactions to be analysed via NMR). Except where  
465 indicated, the ratios of analytes in a solution were 1(ADP):4(AcP) and 1( $\text{Fe}^{3+}$ ):2(ADP). When needed  
466 the pH was adjusted using aqueous HCL and NaOH (1 M or 3 M)

467 After checking the pH (Fisher Scientific accumet AE150 meter with VWR semi-micro pH  
468 electrode), samples were taken at time-points (0, 10 and 30 min, 1 to 5, 10 and 24h) and, unless  
469 otherwise specified, immediately frozen at  $-80\text{ }^{\circ}\text{C}$  for next-day analysis.

470

#### 471 *Pressure reactor*

472 Experiments under pressure were performed in a pressure vessel (Series 4600-1L-VGR with single  
473 inlet valve, Parr Instrument Company), pressurised with  $\text{N}_2$  gas and placed on a hotplate (Fisherbrand  
474 Isotemp Digital Stirring Hotplate) at  $30\text{ }^{\circ}\text{C}$ . Samples for both the high pressure experiment and  
475 ambient pressure control experiment were prepared in 2 mL glass headspace vials (Agilent  
476 Technologies) whose caps were pierced with a needle.

477

#### 478 *FeS clusters*

479 FeS clusters coordinated by 5mM of L-cysteine were prepared under anaerobic conditions and water  
480 sparged with  $\text{N}_2$  was used to prepare all solutions. Stock solutions of 10 mM  $\text{Na}_2\text{S}$ , 10 mM  $\text{FeCl}_3$ , 50  
481 mM of L-cysteine and 1 M of NaOH were prepared either in water or in 10 mM bicarbonate buffer  
482 (pH 9.1). A volume of 4 mL of  $\text{Na}_2\text{S}$  and 4 mL of L-cys were added to 28 mL of water/buffer, and the  
483 pH adjusted to  $\sim 9.8$  using NaOH. A volume of 4 mL of  $\text{FeCl}_3$  was then added and the volume adjusted  
484 to 40 mL to obtain a 1 mM FeS solution.

485 Oxygen levels in the anaerobic glovebox were maintained below 5 ppm when possible, and  
486 no work was conducted if this level was surpassed.

487

#### 488 UV/Vis Spectroscopy

489 UV/Vis spectroscopy was used to verify the formation of FeS clusters. A volume of 1 mL of FeS stock  
490 solution was placed in a crystal cuvette, which was sealed with parafilm under anaerobic conditions.  
491 Spectra were obtained using a Thermofisher NanoDrop 2000c, with a baseline correction of 800 nm.

492

#### 493 **Analysis**

494 *HPLC*



495 Samples were prepared at collection by spinning at 4,000rpm for 2 minutes and diluting 200  $\mu\text{L}$  in  
496 800  $\mu\text{L}$  of EDTA solution (500  $\mu\text{L}$  in 100 mM  $\text{PO}_4$  buffer at pH 7.1) prior to freezing, in order to chelate  
497 the  $\text{Fe}^{3+}$  ions in solution that would otherwise block the HPLC column.

498 Thawed samples were filtered using syringe filters (ANP1322, 0.22  $\mu\text{m}$  PTFE Syringe filter, Gilson  
499 Scientific Ltd.) attached to a 1 mL sterile syringe (BD Plastipak Syringes) in 2 mL headspace vials and  
500 analysed on an HPLC instrument (Agilent Technologies, 1260 Infinity II); peaks were identified using  
501 pure standards. The wavelengths for UV detection were usually set at 254 nm and 260 nm (most  
502 suitable for cyclic rings such as adenosine), while the column tray temperature was maintained at  
503 room temperature. Two different columns were used depending on the pH of the sample being  
504 analysed: Poroshell 120 EC-C18 for pH 2-8 and Poroshell HPH-C18 for pH 9-11.

505 Mobile phase A consisted of 80 mM phosphate buffer (made by mixing equal parts of  
506 potassium phosphate dibasic (40 mM) and potassium phosphate monobasic (40 mM) salts dissolved  
507 in water) adjusted to pH 5.8 using 3 M HCl and filtered with 0.2  $\mu\text{m}$  nylon membrane filters  
508 (GNWP04700, 0.2  $\mu\text{m}$  pore size, Merck Millipore Ltd.), while mobile phase B consisted of 100%  
509 methanol. The injection volume was 1  $\mu\text{L}$ , with a flow rate of 1 mL/min, and the run was an isocratic  
510 gradient that consisted of 95% B for 5 minutes.

511 For experiments using nucleotide diphosphates with different bases, analyses were carried  
512 out on a Polaris C18-A column, with mobile phase A consisting of 10 mM potassium phosphate  
513 monobasic buffer with 10 mM Tetrabutylammonium hydroxide (TBAH) adjusted to pH 8 using 3 M  
514 HCl and filtered with 0.2  $\mu\text{m}$  nylon membrane filters (GNWP04700, 0.2  $\mu\text{m}$  pore size, Merck Millipore  
515 Ltd.), while mobile phase B consisted of 100% methanol (method described in Table 2). The  
516 wavelengths for UV detection were set at 254, 260, and 271 nm for guanosine, uridine and inosine,  
517 and cytidine, respectively.

518

## 519 Table 2 – HPLC method for G, C, I and U nucleotides experiments

520

|                         |                                                                                                                                                                                                                            |
|-------------------------|----------------------------------------------------------------------------------------------------------------------------------------------------------------------------------------------------------------------------|
| <b>Mobile phase A</b>   | 10 mM $\text{KH}_2\text{PO}_4$ + 10 mM TBAH in HPLC-grade water                                                                                                                                                            |
| <b>Mobile phase B</b>   | 100% HPLC-grade methanol                                                                                                                                                                                                   |
| <b>Gradient</b>         | 5% B $\rightarrow$ 50% B (up during 25 min) $\rightarrow$ 50% B (for 2 min) $\rightarrow$ 95% B (up during<br>6 sec) $\rightarrow$ 95% B (for 3 min) $\rightarrow$ 5% B (down during 6 sec) $\rightarrow$ 5% B (for 2 min) |
| <b>Flow rate</b>        | 1.5 mL/min                                                                                                                                                                                                                 |
| <b>Injection volume</b> | 1 $\mu\text{L}$                                                                                                                                                                                                            |

521

522 Two flush methods (

523 Table 3) were employed to preserve the column: Flush 1 was used every 12-15 samples, then three  
524 rounds of Flush 1 followed by one run of Flush 2 were run prior to switching off the machine.

525

526 **Table 3 – HPLC flush methods.** These are run at the end of a set number of sample analyses

527

|                       | <i>FLUSH 1</i>                                                                          | <i>FLUSH 2</i>                                                                                                                       |
|-----------------------|-----------------------------------------------------------------------------------------|--------------------------------------------------------------------------------------------------------------------------------------|
| <b>Mobile phase A</b> | HPLC-grade water                                                                        | HPLC-grade water                                                                                                                     |
| <b>Mobile phase B</b> | 100% HPLC-grade methanol                                                                | 100% HPLC-grade methanol                                                                                                             |
| <b>Gradient</b>       | 5% → 95% B (up during 15 minutes)<br>→ 95% B (for 5 min) → 5% B (down<br>during 10 min) | Initial: 5% B (for 17 min) → 95% B (up<br>during 18 min) → 95% B (for 17 min)<br>→ 60% B (down during 6 min) → 60%<br>B (for 17 min) |
| <b>Flow rate</b>      | 1 mL/min                                                                                | 1 mL/min                                                                                                                             |

528

529 computational analysis was done using Agilent OpenLAB software (ChemStation Edition). Each peak  
530 was manually integrated using the calibration curves as reference and the raw file was exported for  
531 data manipulation. As residual ATP is present in the ADP commercial standard, the yield of the  
532 reaction is calculated by subtracting the reading for ATP at timepoint 0 from all subsequent timepoint  
533 readings.

534

535 <sup>31</sup>P-NMR

536 As iron is paramagnetic and thus tampers with NMR spectra, samples prepared for <sup>31</sup>P-NMR were  
537 purified using solid phase extraction (SPE) after thawing. The SPE cartridge (InertSep ME-1,  
538 300mg/3mL) was equilibrated with 3mL of 100% methanol and then washed with 3mL H<sub>2</sub>O, after  
539 which the sample was passed through and collected. The procedure was tested on control samples to  
540 ensure appropriate recovery

541 A volume of 0.9 mL of purified sample was added to 0.1 mL of D<sub>2</sub>O and dispensed in an NMR  
542 tube (Norell Standard Series 5mm Precision NMR Sampling Tubes) for analysis (<sup>1</sup>H decoupling, Bruker  
543 Avance 400 MHz, 52 scans). The data was processed using the Bruker TopSpin 4.0.7 software and  
544 peaks were identified using pure standards.

545

546 *ESI MS*

547 Electrospray Ionisation Mass Spectrometry was used to confirm the identity of ATP through MS/MS.  
548 After purification through SPE (see previous section) the sample was loaded into a 0.5 mL glass syringe

549 (Gastight Syringe Model 1750 RN, Hamilton) and directly infused into the mass spectrometer (Finnigan  
550 LTQ Linear Ion Trap mass spectrometer) at a flow rate of 10  $\mu\text{L}/\text{min}$ . To avoid contaminations, the  
551 syringe and line were flushed with 100% methanol before and after sample infusion, and the spectra  
552 recorded.

553 The mass spectrometer was operated in negative ion mode and the capillary voltage was set  
554 at -16 V. Data were collected from 100 to 2000  $m/z$  with an acquisition rate of 5 spectra per second.  
555 For the MS/MS Ar was used as the collision gas and the collision energy was adjusted to 30 eV. The  
556 software Xcalibur (Thermo Scientific) was used for method setup and data processing.

557

#### 558 *MALDI-ToF MS*

559 Samples were thawed and desalted using a protocol adapted from Burcar *et al.*[101]. Two solvents  
560 were prepared: an ACN solution consisting of 50% acetonitrile in water and a 0.1 M TEAA solution in  
561 water.

562 Using a Millipore C18 zip tip (Sigma), 10  $\mu\text{L}$  of ACN solution were aspirated and discarded 3  
563 times. The three rinses were repeated with 10  $\mu\text{L}$  of the TEAA solution. To allow for the retention of  
564 the analyte by the zip tip matrix, 10  $\mu\text{L}$  of sample were aspirated up and down eight times and then  
565 discarded. A volume of 10  $\mu\text{L}$  of water were aspirated and discarded, followed by 10  $\mu\text{L}$  of the TEAA  
566 solution and once again 10  $\mu\text{L}$  of water. A volume of 4  $\mu\text{L}$  of ACN were slowly aspirated up and down  
567 three times and deposited into a small Eppendorf microcentrifuge tube.

568 The MALDI-ToF protocol used was designed by Whicher *et al.* [10]. The matrix consisted of  
569 2,4,6-trihydroxyacetophenone monohydrate (THAP) and ammonium citrate dibasic, and was freshly  
570 prepared before the analysis using equal volumes of stocks that were maintained at 4°C for a  
571 maximum of a week.

572 A volume of 2  $\mu\text{L}$  of matrix solution was mixed with 2  $\mu\text{L}$  of sample, deposited onto a clean  
573 steel MALDI-ToF plate and allowed to evaporate for 30 minutes before the introduction of the steel  
574 plate into the instrument (Waters micro MX mass spectrometer). The analytical conditions were:  
575 reflectron and negative ion mode, 400 au of laser power, 2000 V of pulse, 2500 V of the detector,  
576 12,000 V of flight tube, 5200 V of reflector, 3738 V of negative anode, and 500– 5000 amu of scan  
577 range. The mass spectrometer was calibrated using a low-molecular-weight oligonucleotide standard  
578 (comprising of a DNA 4-mer, 5-mer, 7-mer, 9- mer, and 11-mer (Bruker Daltonics)). Each  
579 oligonucleotide standard was initially dissolved in 100  $\mu\text{L}$  water, divided in aliquots and frozen at -80  
580 °C. A fresh aliquot was used at each analytical calibration.

## 581 References

- 582 1. Nicholls DG, Ferguson S. Bioenergetics: Fourth Edition. Bioenergetics: Fourth Edition.  
583 Academic Press; 2013.
- 584 2. de Duve C. Singularities : Landmarks on the Pathways of Life. New York, USA: Cambridge  
585 University Press; 2005.
- 586 3. Kottur J, Nair DT. Pyrophosphate hydrolysis is an intrinsic and critical step of the DNA  
587 synthesis reaction. *Nucleic Acids Res.* 2018;46: 5875–5885. doi:10.1093/nar/gky402
- 588 4. Berg P, Ofengand EJ. An Enzymatic Mechanism for Linking Amino Acids to RNA. *Proc Natl*  
589 *Acad Sci.* 1958;44: 78–86. doi:10.1073/pnas.44.2.78
- 590 5. Ofengand EJ, Dieckmann M, Berg P. The enzymic synthesis of amino acyl derivatives of  
591 ribonucleic acid. *J Biol Chem.* 1961;236: 1741–1747. doi:10.1038/181303a0
- 592 6. Ibba M, Söll D. Aminoacyl-tRNA Synthesis. *Annu Rev Biochem.* 2000;69: 617–650.
- 593 7. do Nascimento Vieira A, Kleinermanns K, Martin WF, Preiner M. The ambivalent role of water  
594 at the origins of life. *FEBS Lett.* 2020;594: 2717–2733. doi:10.1002/1873-3468.13815
- 595 8. Herdewijn P, Marlière P. Redesigning the leaving group in nucleic acid polymerization. *FEBS*  
596 *Letters.* No longer published by Elsevier; 2012. pp. 2049–2056.  
597 doi:10.1016/j.febslet.2012.02.033
- 598 9. Braakman R, Smith E. The emergence and early evolution of biological carbon-fixation. *PLoS*  
599 *Comput Biol.* 2012;8: 1002455. doi:10.1371/journal.pcbi.1002455
- 600 10. Whicher A, Camprubí E, Pinna S, Herschy B, Lane N. Acetyl Phosphate as a Primordial Energy  
601 Currency at the Origin of Life. *Orig Life Evol Biosph.* 2018;48: 159–179. doi:10.1007/s11084-  
602 018-9555-8
- 603 11. Copley SD, Smith E, Morowitz HJ. The origin of the RNA world: Co-evolution of genes and  
604 metabolism. *Bioorg Chem.* 2007;35: 430–443. doi:10.1016/j.bioorg.2007.08.001
- 605 12. Lane N, Allen JF, Martin W. How did LUCA make a living? Chemiosmosis in the origin of life.  
606 *BioEssays.* 2010;32: 271–280. doi:10.1002/bies.200900131
- 607 13. Martin WF, Sousa FL, Lane N. Energy at life’s origin. *Science (80- ).* 2014;344: 1092–1093.  
608 doi:10.1111/soru.12033.11.
- 609 14. Fontecilla-Camps JC. Primordial bioenergy sources: The two facets of adenosine triphosphate.  
610 *J Inorg Biochem.* 2021;216: 111347. doi:10.1016/j.jinorgbio.2020.111347
- 611 15. Berg IA, Kockelkorn D, Ramos-Vera WH, Say RF, Zarzycki J, Hügler M, et al. Autotrophic  
612 carbon fixation in archaea. *Nat Rev Microbiol.* 2010;8: 447–460. doi:10.1038/nrmicro2365
- 613 16. Say RF, Fuchs G. Fructose 1,6-bisphosphate aldolase/phosphatase may be an ancestral  
614 gluconeogenic enzyme. *Nature.* 2010;464: 1077–1081. doi:10.1038/nature08884
- 615 17. Ferry JG, House CH. The stepwise evolution of early life driven by energy conservation. *Mol*  
616 *Biol Evol.* 2006;23: 1286–1292. doi:10.1093/molbev/msk014
- 617 18. Schönheit P, Buckel W, Martin W. On the Origin of Heterotrophy. *Trends Microbiol.* 2016;24:  
618 12–25. doi:10.1016/j.tim.2015.10.003
- 619 19. Lipmann F. Wanderings of a Biochemist. New York, USA: Wiley-Interscience; 1971. Available:  
620 [https://books.google.com/books/about/Wanderings\\_of\\_a\\_Biochemist.html?id=jHuBAAAAIA](https://books.google.com/books/about/Wanderings_of_a_Biochemist.html?id=jHuBAAAAIAAJ)  
621 [AJ](https://books.google.com/books/about/Wanderings_of_a_Biochemist.html?id=jHuBAAAAIAAJ)
- 622 20. Lipmann F, Tuttle LC. Acetyl phosphate: chemistry, determination, and synthesis. *J Biol Chem.*  
623 1944;153: 571–582. Available: <http://www.jbc.org/content/153/2/571.full.pdf>
- 624 21. Decker K, Jungermann K, Thauer RK. Energy Production in Anaerobic Organisms. *Angew*  
625 *Chemie Int Ed.* 1970;9: 138–158.
- 626 22. Thauer RK, Jungermann K, Decker K. Energy conservation in chemotrophic anaerobic  
627 bacteria. *Bacteriol Rev.* 1977;41: 100–180. doi:10.1073/pnas.0803850105
- 628 23. Martin W, Russell MJ. On the origin of biochemistry at an alkaline hydrothermal vent. *Philos*  
629 *Trans R Soc Lond B Biol Sci.* 2007;362: 1887–925. doi:10.1098/rstb.2006.1881
- 630 24. de Duve C. Did God make RNA? *Nature.* 1988;336: 209–210. doi:10.1038/332141a0

- 631 25. de Duve C. *Blueprint for a Cell - The Nature and Origin of Life*. Burlington, North Carolina,  
632 USA: Neil Patterson Publishers; 1991.
- 633 26. de Duve C. Clues from present-day biology: the thioester world. In: Brack A, editor. *The*  
634 *Molecular Origins of Life*. Cambridge University Press; 1998. pp. 219–236.  
635 doi:10.1017/cbo9780511626180.012
- 636 27. Sousa FL, Thiergart T, Landan G, Nelson-Sathi S, Pereira IAC, Allen JF, et al. Early bioenergetic  
637 evolution. *Philos Trans R Soc B Biol Sci*. 2013;368: 20130088–20130088.  
638 doi:10.1098/rstb.2013.0088
- 639 28. Sojo V, Herschy B, Whicher A, Camprubí E, Lane N. The origin of life in alkaline hydrothermal  
640 vents. *Astrobiology*. 2016;16: 181–197. doi:10.1089/ast.2015.1406
- 641 29. Goldford JE, Hartman H, Smith TF, Segrè D. Remnants of an Ancient Metabolism without  
642 Phosphate. *Cell*. 2017;168: 1126–1134.e9. doi:10.1016/j.cell.2017.02.001
- 643 30. Hartman H. Speculations on the Origin and Evolution of Metabolism. *J Mol Evol*. 1975;4: 359–  
644 370. doi:10.1007/BF01732537
- 645 31. Kitadai N, Nakamura R, Yamamoto M, Okada S, Takahagi W, Nakano Y, et al. Thioester  
646 synthesis through geoelectrochemical CO<sub>2</sub> fixation on Ni sulfides. *Commun Chem*. 2021;4: 1–  
647 9. doi:10.1038/s42004-021-00475-5
- 648 32. Kitani A, Tsunetsugu S, Sasaki K. Fe(III)-ion-Catalysed Non-enzymatic Transformation of ADP  
649 into ATP. *J Chem Soc Perkin Trans*. 1991; 329–331. Available:  
650 <http://pubs.rsc.org/en/content/articlepdf/1991/p2/p29910000329>
- 651 33. Kitani A, Tsunetsugu S, Suzuki A, Ito S, Sasaki K. Fe(III)-ion-catalysed non-enzymatic  
652 transformation of adenosine diphosphate into adenosine triphosphate part II. Evidence of  
653 catalytic nature of Fe ions. *Bioelectrochemistry Bioenerg*. 1995;36: 47–51. doi:10.1016/0302-  
654 4598(94)01751-L
- 655 34. Di Sabato G, Jencks WP. Mechanism and Catalysis of Reactions of Acyl Phosphates. I.  
656 Nucleophilic Reactions. *J Am Chem Soc*. 1961;83: 4400–4405. doi:10.1021/ja01482a025
- 657 35. Tauchert K, Jahn A, Oelze J. Control of diauxic growth of *Azotobacter vinelandii* on acetate  
658 and glucose. *J Bacteriol*. 1990;172: 6447–6451. doi:10.1128/jb.172.11.6447-6451.1990
- 659 36. Reinscheid DJ, Schnicke S, Rittmann D, Zahn U, Sahn H, Eikmanns BJ. Cloning, sequence  
660 analysis, expression and inactivation of the *Corynebacterium glutamicum* pta-ack operon  
661 encoding phosphotransacetylase and acetate kinase. *Microbiology*. 1999;145: 503–513.  
662 doi:10.1099/13500872-145-2-503
- 663 37. Xu WJ, Wen H, Kim HS, Ko YJ, Dong SM, Park IS, et al. Observation of acetyl phosphate  
664 formation in mammalian mitochondria using real-time in-organelle NMR metabolomics. *Proc*  
665 *Natl Acad Sci U S A*. 2018;115: 4152–4157. doi:10.1073/pnas.1720908115
- 666 38. Jordan SF, Ioannou I, Rammu H, Halpern A, Bogart LK, Ahn M, et al. Spontaneous assembly of  
667 redox-active iron-sulfur clusters at low concentrations of cysteine. *Nat Commun*. 2021;In  
668 press.
- 669 39. Storer AC, Cornish-Bowden A. Concentration of MgATP<sup>2-</sup> and other ions in solution.  
670 Calculation of the true concentrations of species present in mixtures of associating ions.  
671 *Biochem J*. 1976;159: 1–5. doi:10.1042/bj1590001
- 672 40. Holm NG. The significance of Mg in prebiotic geochemistry. *Geobiology*. 2012;10: 269–279.  
673 doi:10.1111/j.1472-4669.2012.00323.x
- 674 41. Winzer K, Lorenz K, Dürre P. Acetate kinase from *Clostridium acetobutylicum*: A highly  
675 specific enzyme that is actively transcribed during acidogenesis and solventogenesis.  
676 *Microbiology*. 1997;143: 3279–3286. doi:10.1099/00221287-143-10-3279
- 677 42. Ramirez F, Marecek JF, Szamosi J. Magnesium and Calcium Ion Effects on Hydrolysis Rates of  
678 Adenosine 5'-Triphosphate. *Journal of Organic Chemistry*. Academic Press; 1980. pp. 4748–  
679 4752. doi:10.1039/c2dt90214a
- 680 43. Williams NH. Magnesium ion catalyzed ATP hydrolysis. *J Am Chem Soc*. 2000;122: 12023–  
681 12024. doi:10.1021/ja0013374

- 682 44. Leibrock E, Bayer P, Lüdemann HD. Nonenzymatic hydrolysis of adenosinetriphosphate (ATP)  
683 at high temperatures and high pressures. *Biophys Chem.* 1995;54: 175–180.  
684 doi:10.1016/0301-4622(94)00134-6
- 685 45. Etaix E, Orgel LE. Phosphorylation of Nucleosides in Aqueous-Solution Using  
686 Trimetaphosphate-Formation of Nucleoside Triphosphates. *J Carbohydrates-Nucleosides-*  
687 *Nucleotides.* 1978;5: 91–110.
- 688 46. Yamagata Y, Inoue H, Inomata K. Specific effect of magnesium on 2',3'-cyclic AMP synthesis  
689 from adenosine and trimetaphosphate in aqueous solution. *Orig Life Evol Biosph.* 1995;25:  
690 47–52. Available: <https://link.springer.com/content/pdf/10.1007/BF01581572.pdf>
- 691 47. Ozawa K, Nemoto A, Imai EI, Honda H, Hatori K, Matsuno K. Phosphorylation of nucleotide  
692 molecules in hydrothermal environments. *Orig Life Evol Biosph.* 2004;34: 465–471.  
693 doi:10.1023/B:ORIG.0000043121.65714.05
- 694 48. Holm NG, Baltscheffsky H. Links Between Hydrothermal Environments, Pyrophosphate, Na +,  
695 and Early Evolution. *Orig Life Evol Biosph.* 2011;41: 483–493. doi:10.1007/s11084-011-9235-4
- 696 49. Bryant DE, Greenfield D, Walshaw RD, Johnson BRG, Herschy B, Smith C, et al. Hydrothermal  
697 modification of the Sikhote-Alin iron meteorite under low pH geothermal environments. A  
698 plausibly prebiotic route to activated phosphorus on the early Earth. *Geochim Cosmochim*  
699 *Acta.* 2013;109: 90–112. doi:10.1016/j.gca.2012.12.043
- 700 50. Kee TP, Bryant DE, Herschy B, Marriott KER, Cosgrove NE, Pasek MA, et al. Phosphate  
701 activation via reduced oxidation state phosphorus (P). Mild routes to condensed-P energy  
702 currency molecules. *Life.* 2013;3: 386–402. doi:10.3390/life3030386
- 703 51. Pasek MA, Harnmeijer JP, Buick R, Gull M, Atlas Z. Evidence for reactive reduced phosphorus  
704 species in the early Archean ocean. *Proc Natl Acad Sci U S A.* 2013;110: 10089–94.  
705 doi:10.1073/pnas.1303904110
- 706 52. Kaye K, Bryant DE, Marriott KER, Ohara S, Fishwick CWG, Kee TP. Selective Phosphonylation  
707 of 5'-Adenosine Monophosphate (5'-AMP) via Pyrophosphite [PPi(III)]. *Orig Life Evol Biosph.*  
708 2016;46: 425–434. doi:10.1007/s11084-016-9497-y
- 709 53. Pasek M, Omran A, Lang C, Gull M, Abbatiello J, Feng T, et al. Serpentinization as a route to  
710 liberating phosphorus on habitable worlds. *Res Sq [Preprint].* 2020. doi:10.21203/rs.3.rs-  
711 37651/v1
- 712 54. Coggins AJ, Powner MW. Prebiotic synthesis of phosphoenol pyruvate by  $\alpha$ -phosphorylation-  
713 controlled triose glycolysis. *Nat Chem.* 2017;9: 310–317. doi:10.1038/nchem.2624
- 714 55. Liu Z, Rossi JC, Pascal R. How prebiotic chemistry and early life chose phosphate. *Life.* 2019;9:  
715 1–16. doi:10.3390/life9010026
- 716 56. Lagoja IM, Herdewijn P. A potential prebiotic route to adenine from hypoxanthine. *Chem*  
717 *Biodivers.* 2005;2: 923–927. doi:10.1002/cbdv.200590069
- 718 57. Allen CM, Ellen Jones ME. Decomposition of Carbamylphosphate in Aqueous Solutions\*.  
719 *Biochemistry.* 1964;3: 1238–1247.
- 720 58. Lohrmann R, Orgel LE. Prebiotic synthesis: phosphorylation in aqueous solution. *Science.*  
721 1968;161: 64–66. doi:10.1126/science.161.3836.64
- 722 59. Du F, Mao XA, Li DF, Liao ZR. Binding site of Fe<sup>3+</sup> at purine of ATP as studied by NMR. *J Inorg*  
723 *Biochem.* 2001;83: 101–105. doi:10.1016/S0162-0134(00)00185-9
- 724 60. Rabinowitz IN, Davis FF, Herber RH. Mossbauer-Effect Studies on Metal Binding in Purine  
725 Compounds1a. *J Am Chem Soc.* 1966;88: 4346–4354. doi:10.1021/ja00971a008
- 726 61. Izatt RM, Christensen JJ, Rytting JH. Erratum: Sites and thermodynamic quantities associated  
727 with proton and metal ion interaction with ribonucleic acid, deoxyribonucleic acid, and their  
728 constituent bases, nucleosides, and nucleotides. *Chemical Reviews.* 1972. pp. 439–481.  
729 doi:10.1021/cr60280a005
- 730 62. Gao Y gui, Sriram M, Wang AHJ. Crystallographic studies of metal ion - DNA interactions:  
731 Different binding modes of cobalt(II), copper(II) and barium(II) to N7 of guanines in Z-DNA  
732 and a drug-DNA complex. *Nucleic Acids Res.* 1993;21: 4093–4101.

- 733 doi:10.1093/nar/21.17.4093
- 734 63. Šponer J, Sabat M, Gorb L, Leszczynski J, Lippert B, Hobzat P. The effect of metal binding to  
735 the N7 site of purine nucleotides on their structure, energy, and involvement in base pairing.  
736 J Phys Chem B. 2000;104: 7535–7544. doi:10.1021/jp001711m
- 737 64. Sigel H. Have adenosine 5'-triphosphate (ATP<sup>4-</sup>) and related purine-nucleotides played a  
738 role in early evolution? ATP, its own 'enzyme' in metal ion facilitated hydrolysis! Inorganica  
739 Chim Acta. 1992;198: 1–11. Available:  
740 <http://www.sciencedirect.com/science/article/pii/S0020169300923429>
- 741 65. Morasch M, Mast CB, Langer JK, Schilcher P, Braun D. Dry polymerization of 3',5'-cyclic GMP  
742 to long strands of RNA. ChemBioChem. 2014;15: 879–883. doi:10.1002/cbic.201300773
- 743 66. Goucher CR, Taylor JF. Compounds of Ferric Iron with Adenosine Triphosphate and Other  
744 Nucleoside Phosphates. J Biol Chem. 1964;239: 2251–2255.
- 745 67. Ouameur AA, Arakawa H, Ahmad R, Naoui M, Tajmir-Riahi HA. A comparative study of Fe(II)  
746 and Fe(III) interactions with DNA duplex: Major and minor grooves bindings. DNA Cell Biol.  
747 2005;24: 394–401. doi:10.1089/dna.2005.24.394
- 748 68. Swain M. chemicalize.org. J Chem Inf Model. 2012;52: 613–615. doi:10.1021/ci300046g
- 749 69. Yathindra N, Sundaralingam M. Correlation between the backbone and side chain  
750 conformations in 5'-nucleotides. The concept of a 'rigid' nucleotide conformation.  
751 Biopolymers. 1973;12: 297–314. doi:10.1002/bip.1973.360120208
- 752 70. Auffinger P, Grover N, Westhof E. Metal ion binding to RNA. Metal ions in life sciences. 2011.  
753 doi:10.1515/9783110436648-006
- 754 71. Shannon RD. Revised effective ionic radii and systematic studies of interatomic distances in  
755 halides and chalcogenides. Acta Crystallogr Sect A. 1976;32: 751–767.  
756 doi:10.1107/S0567739476001551
- 757 72. Wolfe AJ. Physiologically relevant small phosphodonors link metabolism to signal  
758 transduction. Curr Opin Microbiol. 2010;13: 204–209. doi:10.1016/j.mib.2010.01.002
- 759 73. Jones ME, Spector L, Lipmann F. Carbamyl phosphate, the carbamyl donor in enzymatic  
760 citrulline synthesis. J Am Chem Soc. 1955;77: 819–820. doi:10.1021/ja01608a101
- 761 74. Jones ME, Lipmann F. Chemical and enzymatic synthesis of carbamyl phosphate. Proc Natl  
762 Acad Sci. 1960;46: 1194–205.
- 763 75. Lohrmann R, Orgel LE. Urea-Inorganic Phosphate Mixtures as Prebiotic Phosphorylating  
764 Agents. Science (80- ). 1971;171: 490–494. doi:10.1126/science.171.3970.490
- 765 76. Saygin Ö. Nonenzymatic photophosphorylation with visible light - A possible mode of  
766 prebiotic ATP formation. Naturwissenschaften. 1981;68: 617–619. doi:10.1007/BF00398616
- 767 77. Saygin Ö. Nonenzymatic phosphorylation of acetate by carbamyl phosphate. Orig Life Evol  
768 Biosph. 1983;13: 43–48.
- 769 78. Saygin Ö. Photochemical carbamylphosphate formation and metal ion catalysed  
770 transphosphorylations between carbamylphosphate and adenine nucleotides or carboxyl  
771 groups. Orig Life Evol Biosph. 1984;14: 131–137. doi:10.1007/BF00933649
- 772 79. Ramón-Maiques S, Marina A, Guinot A, Gil-Ortiz F, Uriarte M, Fita I, et al. Substrate binding  
773 and catalysis in carbamate kinase ascertained by crystallographic and site-directed  
774 mutagenesis studies: Movements and significance of a unique globular subdomain of this key  
775 enzyme for fermentative ATP production in bacteria. J Mol Biol. 2010;397: 1261–1275.  
776 doi:10.1016/j.jmb.2010.02.038
- 777 80. Schultheisz HL, Szymczyzna BR, Scott LG, Williamson JR. Enzymatic de novo pyrimidine  
778 nucleotide synthesis. J Am Chem Soc. 2011;133: 297–304. doi:10.1021/ja1059685
- 779 81. Branscomb E, Biancalani T, Goldenfeld N, Russell MJ. Escapement mechanisms and the  
780 conversion of disequilibria; the engines of creation. Phys Rep. 2017;677: 1–60.  
781 doi:10.1016/j.physrep.2017.02.001
- 782 82. Phillips RC, George P, Rutman RJ. Thermodynamic data for the hydrolysis of adenosine  
783 triphosphate as a function of pH, Mg<sup>2+</sup> ion concentration, and ionic strength. J Biol Chem.

- 784 1969;244: 3330–3342. doi:10.1016/s0021-9258(18)93131-5
- 785 83. Manchester K. Free energy ATP hydrolysis and phosphorylation potential. *Biochem Educ.*
- 786 1980;8: 70–72. doi:10.1016/0307-4412(80)90043-6
- 787 84. Russell MJ, Hall AJ. The emergence of life from iron monosulphide bubbles at a submarine
- 788 hydrothermal redox and pH front. *J Geol Soc London.* 1997;154: 377–402.
- 789 doi:10.1144/gsjgs.154.3.0377
- 790 85. Martin W, Russell MJ. On the origins of cells: A hypothesis for the evolutionary transitions
- 791 from abiotic geochemistry to chemoautotrophic prokaryotes, and from prokaryotes to
- 792 nucleated cells. *Philosophical Transactions of the Royal Society B: Biological Sciences.* 2003.
- 793 pp. 59–85. doi:10.1098/rstb.2002.1183
- 794 86. Nitschke W, Russell MJ. Hydrothermal focusing of chemical and chemiosmotic energy,
- 795 supported by delivery of catalytic Fe, Ni, Mo/W, Co, S and Se, forced life to emerge. *J Mol*
- 796 *Evol.* 2009;69: 481–496. doi:10.1007/s00239-009-9289-3
- 797 87. Vasiliadou R, Dimov N, Szita N, Jordan SF, Lane N. Possible mechanisms of CO<sub>2</sub> reduction by
- 798 H<sub>2</sub> via prebiotic vectorial electrochemistry. *Interface Focus.* 2019;9: 20190073.
- 799 doi:10.1098/rsfs.2019.0073
- 800 88. Jordan SF, Rammu H, Zheludev IN, Hartley AM, Maréchal A, Lane N. Promotion of protocell
- 801 self-assembly from mixed amphiphiles at the origin of life. *Nat Ecol Evol* 2019. 2019; 1–10.
- 802 doi:10.1038/s41559-019-1015-y
- 803 89. Jordan SF, Nee E, Lane N. Isoprenoids enhance the stability of fatty acid membranes at the
- 804 emergence of life potentially leading to an early lipid divide. *Interface Focus.* 2019;Submitted.
- 805 doi:10.1098/rsfs.2019.0067
- 806 90. Hudson R, de Graaf R, Rodin MS, Ohno A, Lane N, McGlynn SE, et al. CO<sub>2</sub> reduction driven by
- 807 a pH gradient. *Proc Natl Acad Sci.* 2020;117: 22873–22879. doi:10.1101/2020.03.02.973982
- 808 91. Ducluzeau AL, van Lis R, Duval S, Schoepp-Cothenet B, Russell MJ, Nitschke W. Was nitric
- 809 oxide the first deep electron sink? *Trends Biochem Sci.* 2009;34: 9–15.
- 810 doi:10.1016/j.tibs.2008.10.005
- 811 92. Marteinson VT, Kristjánsson JK, Kristmannsdóttir H, Dahlkvist M, Sæmundsson K,
- 812 Hannington M, et al. Discovery and description of giant submarine smectite cones on the
- 813 seafloor in Eyjafjörður, northern Iceland, and a novel thermal microbial habitat. *Appl Environ*
- 814 *Microbiol.* 2001;67: 827–833. doi:10.1128/AEM.67.2.827-833.2001
- 815 93. Morse JW, Mackenzie FT. Hadean Ocean carbonate geochemistry. *Aquat Geochemistry.*
- 816 1998;4: 301–319. doi:10.1023/a:1009632230875
- 817 94. Shibuya T, Russell MJ, Takai K. Free energy distribution and hydrothermal mineral
- 818 precipitation in Hadean submarine alkaline vent systems: Importance of iron redox reactions
- 819 under anoxic conditions. *Geochim Cosmochim Acta.* 2016;175: 1–19.
- 820 doi:10.1016/j.gca.2015.11.021
- 821 95. Camprubí E, Jordan SF, Vasiliadou R, Lane N. Iron catalysis at the origin of life. *IUBMB Life.*
- 822 2017;69: 373–381. doi:10.1002/iub.1632
- 823 96. Varma SJ, Muchowska KB, Chatelain P, Moran J. Native iron reduces CO<sub>2</sub> to intermediates
- 824 and end-products of the acetyl-CoA pathway. *Nat Ecol Evol.* 2018;2: 1019–1024.
- 825 doi:10.1038/s41559-018-0542-2
- 826 97. Muchowska KB, Varma SJ, Moran J. Synthesis and breakdown of universal metabolic
- 827 precursors promoted by iron. *Nature.* 2019;569: 104–107. doi:10.1038/s41586-019-1151-1
- 828 98. Nunes Palmeira R, Colnaghi M, Harrison SA, Pomiankowski A, Lane N. The Limits of Metabolic
- 829 Heredity in Protocells. *Manuscr prep.* 2021.
- 830 99. Yamagata Y. Non-enzymatic ATP synthesis by the phosphorylation of ADP with the assistance
- 831 of cyanate and magnesium ion. *Orig Life Evol Biosph.* 1996;26: 242–243.
- 832 doi:10.1007/bf02459735
- 833 100. Yamagata Y. Prebiotic Formation of ADP and ATP From AMP, Calcium Phosphates and
- 834 Cyanate in Aqueous Solution. *Orig Life Evol Biosph.* 1999;29: 511–520.



- 835 101. Burcar BT, Cassidy LM, Moriarty EM, Joshi PC, Coari KM, McGown LB. Potential Pitfalls in  
836 MALDI-TOF MS Analysis of Abiotically Synthesized RNA Oligonucleotides. *Orig Life Evol*  
837 *Biosph.* 2013;43: 247–261. doi:10.1007/s11084-013-9334-5  
838 102. Spectrum MCH00020 for Adenosine 5'-triphosphate. In: MoNA - MassBank of North America  
839 [Internet]. 2016. Available: <https://mona.fiehnlab.ucdavis.edu/spectra/display/MCH00020>  
840

841 **Figure 1**

842

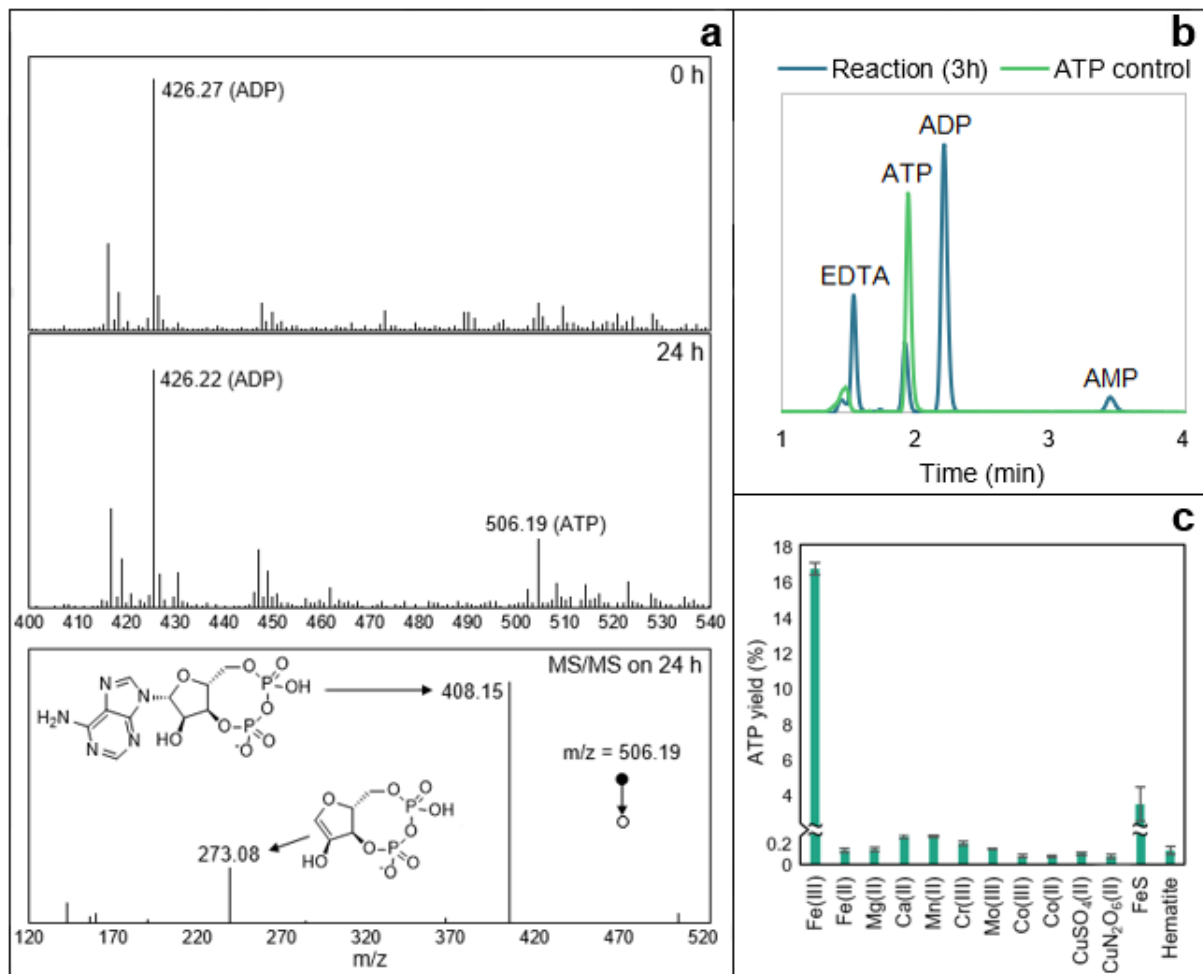

843

844

845 **Figure 1 – ATP synthesis with metal ion catalysts.** (a) Mass spectrometry analysis on a reaction  
846 sample at t = 0 h (upper panel) and 24 h (middle panel). The MS/MS spectrum and proposed  
847 structures of the products of the fragmentation of the ATP mass detected at 24 h (m/z = 506.19) is  
848 shown in the lower panel and was confronted to commercial standards and public data [102].  
849 Conditions: ADP (1 mM) + AcP (4 mM) + Fe<sup>3+</sup> (500 μM) at 30°C and pH ~5.5–6. (b) HPLC trace of ATP  
850 control (0.7 mM) and ATP produced by the reaction ADP (1 mM) + AcP (4 mM) + Fe<sup>3+</sup> (500 μM) at  
851 30°C and pH ~5.5–6. (c) Test of reaction ADP (1 mM) + AcP (4 mM) at 30°C and pH ~5.5–6 with Fe<sup>3+</sup>  
852 (Fe<sub>2</sub>(SO<sub>4</sub>)<sub>3</sub>), Mg<sup>2+</sup> (MgCl<sub>2</sub>), Ca<sup>2+</sup> (CaCl<sub>2</sub>), Mn<sup>2+</sup> (Mn(NO<sub>3</sub>)<sub>2</sub>), Cr<sup>3+</sup> (Cr(NO<sub>3</sub>)<sub>3</sub>), Mo<sup>3+</sup> (MoCl<sub>3</sub>), Co<sup>3+</sup>  
853 ([Co(NH<sub>3</sub>)<sub>6</sub>]Cl<sub>3</sub>), Co<sup>2+</sup> (CoCl<sub>2</sub>), CuSO<sub>4</sub>, Cu(NO<sub>3</sub>)<sub>2</sub>, FeS clusters (500 μM) and hematite (Fe<sub>2</sub>O<sub>3</sub>, 50 mg).  
854 The bars represent the ATP yield after 5h. N = 3 ± SD.

855

856 **Figure 2**

857

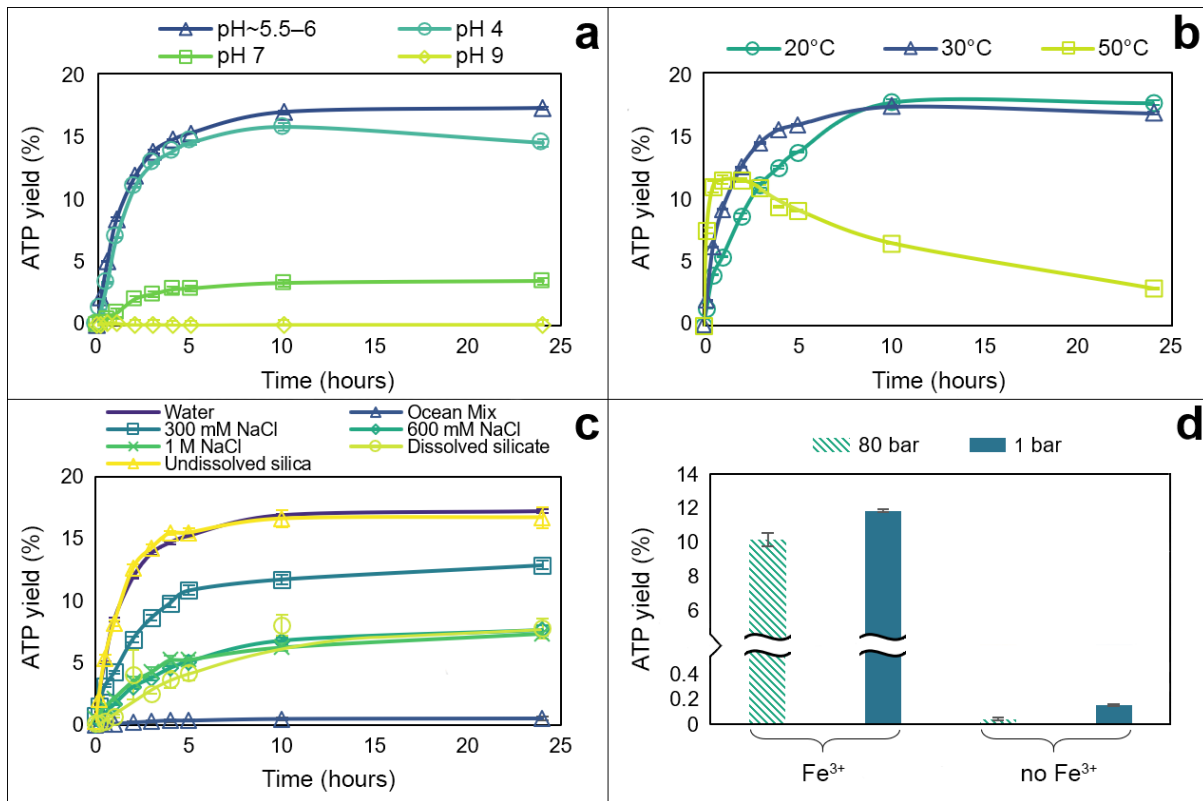

858

859

860 **Figure 2 – ATP synthesis by ACP and Fe<sup>3+</sup> at different conditions.** (a) Effect of pH on reaction ADP (1  
861 mM) + AcP (4 mM) + Fe<sup>3+</sup> (500 μM) at 30°C. The optimal pH of the reaction is ~5.5–6. Rate of  
862 reaction: 0.0079 μM/s (optimal pH), 0.0074 μM/s (pH 4) and 0.0011 μM/s (pH 7). N = 3 ±SD. (b)  
863 Effect of temperature on reaction ADP (1 mM) + AcP (4 mM) + Fe<sup>3+</sup> (500 μM), pH ~5.5–6. Rate of  
864 reaction: 0.0066 μM/s (20°C), 0.0079 μM/s (30°C) and 0.028 μM/s (50°C). N = 3 ±SD. (c) Comparison  
865 of ATP yield from the reaction ADP (1 mM) + AcP (4 mM) at 30°C, pH ~5.5–6 in water (reaction ionic  
866 strength = 3.75 mM), a modern ocean mix (600 mM NaCl, 50 mM MgCl<sub>2</sub> and 10 mM CaCl<sub>2</sub>, reaction  
867 ionic strength = 783.75 mM), 300 mM NaCl (reaction ionic strength = 303.75 mM), modern ocean  
868 concentration of NaCl (600 mM, reaction ionic strength = 603.75 mM), 1 mM NaCl (reaction ionic  
869 strength = 1.004 M), dissolved silicate (10 mM SiO<sub>2</sub>, reaction ionic strength = 123.75 mM), and  
870 suspended silica in water (50 mg). N = 3 ±SD. (d) Comparison of ATP yield from the reaction ADP (1  
871 mM) + AcP (4 mM) at 30°C and pH ~5.5–6 with and without Fe<sup>3+</sup> (500 μM) at 80 bar (striped yellow)  
872 and at atmospheric pressure (1 bar, solid blue). N = 2 ±SD.

873

874 **Figure 3**

875

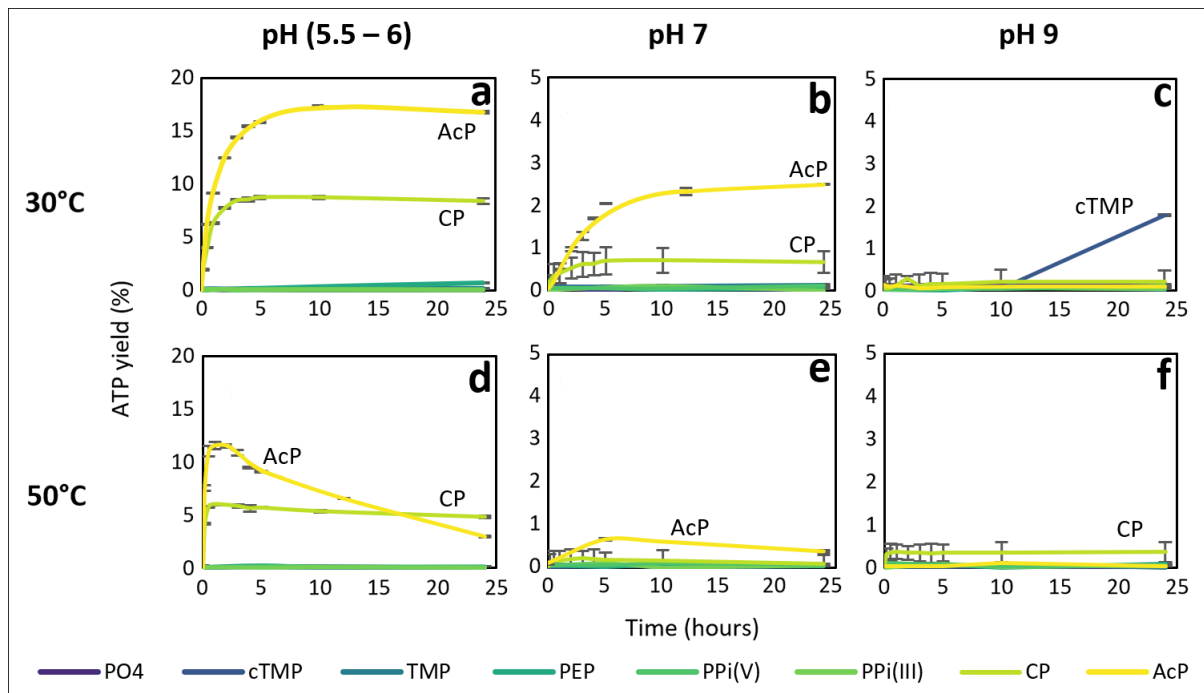

876

877

878 **Figure 3 – ATP synthesis with different phosphorylating agents.** 1:4 ADP:phosphorylating agent  
879 reaction catalysed by Fe<sup>3+</sup> with various phosphorylating agents at different pH and temperature.  
880 PO<sub>4</sub>: potassium phosphate; cTMP: trimetaphosphate; TMP: trimethyl phosphate; PEP:  
881 phosphoenolpyruvate; PPI(V): pyrophosphate; PPI(III): pyrophosphite; CP: carbamoyl phosphate;  
882 AcP: acetyl phosphate. N = 3 ±SD.

883

884 **Figure 4**

885

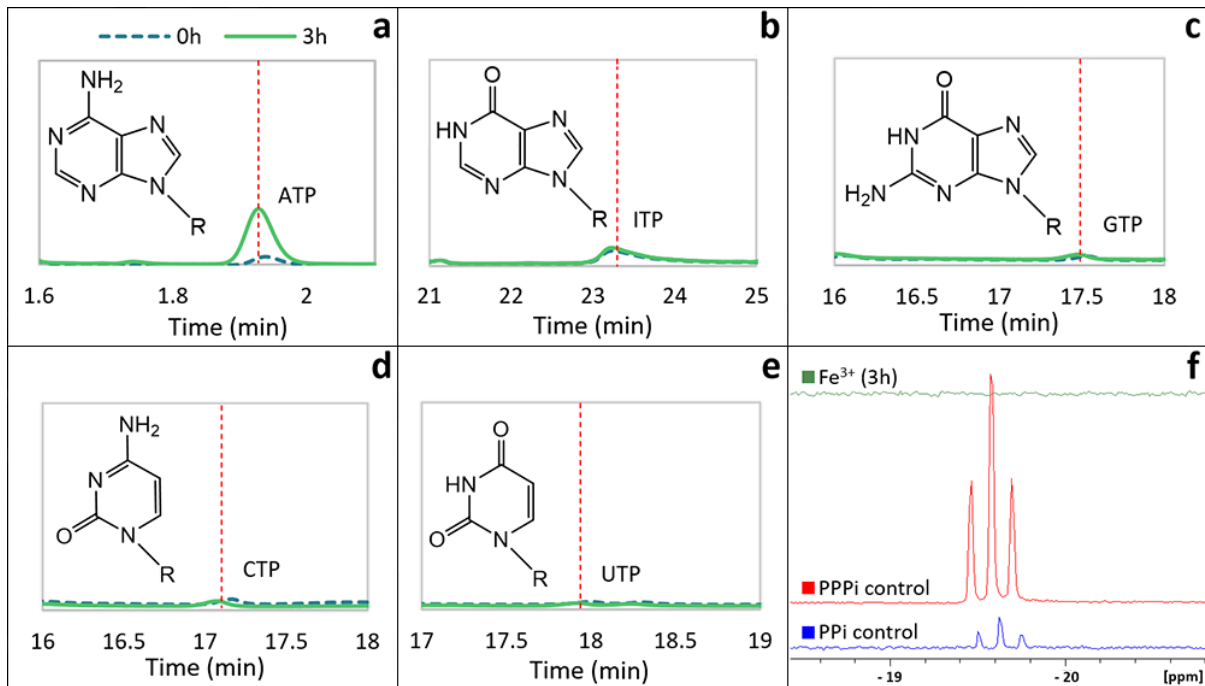

886

887

888 **Figure 4 – Phosphorylation of nucleotide diphosphates by AcP.** HPLC chromatogram of the resulting  
889 NTP of the phosphorylation of (a) adenosine diphosphate (ADP), (b) inosine diphosphate (IDP), (c)  
890 guanosine diphosphate (GDP), (d) cytidine diphosphate (CDP) and (e) uridine diphosphate (UDP) by  
891 AcP catalysed by Fe<sup>3+</sup> at 30°C and pH ~5.5–6 at the beginning of the reaction (0 h, broken line, blue)  
892 and after 3 hours (solid line, red). The molecular structure of each base forming the nucleotides is  
893 shown. (f) <sup>31</sup>P-NMR spectrum of PPI (bottom, blue), PPPi (middle, red) and the reaction PPI (1 mM) +  
894 AcP (4 mM) + Fe<sup>3+</sup> (500 μM) at 30°C and pH ~5.5–6 after 3h (top, green).

895

896

897

898 **Figure 5**

899

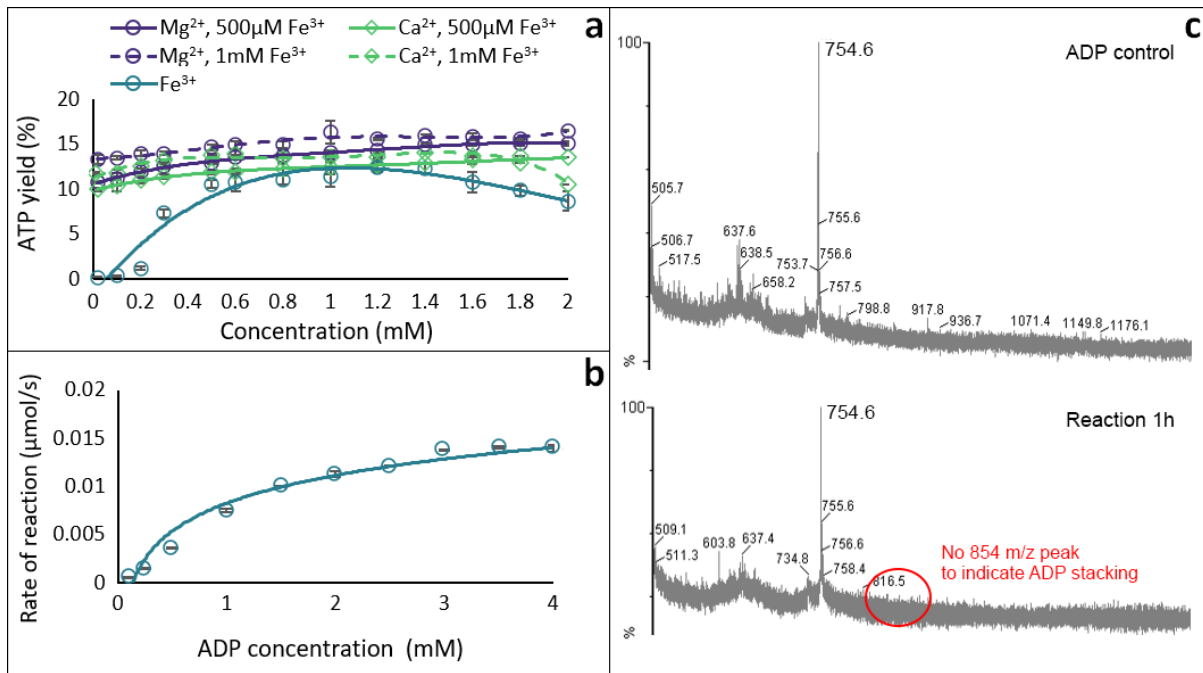

900

901

902 **Figure 5 – Mechanism studies.** (a) Effect of varying concentration of Fe<sup>3+</sup> (teal circles) and adding  
903 increasing concentrations of Mg<sup>2+</sup> (purple circles) and Ca<sup>2+</sup> (green diamonds) on ATP yield at 2 h from  
904 the reaction ADP (1 mM) + AcP (4 mM) with 0.5 mM Fe<sup>3+</sup> (solid line) and 1mM Fe<sup>3+</sup> (broken line) at  
905 30°C and pH ~5.5–6. (N = 3 ±SD and 2 ±SD, respectively). (b) Michaelis-Menten kinetic analysis on  
906 the ADP + AcP reaction catalysed by Fe<sup>3+</sup> (0.5 mM). N = 3 ±SD. (c) MALDI-ToF spectra of ADP control  
907 (top) and a reaction sample at 1 h (bottom).

908

909 **Figure 6**

910

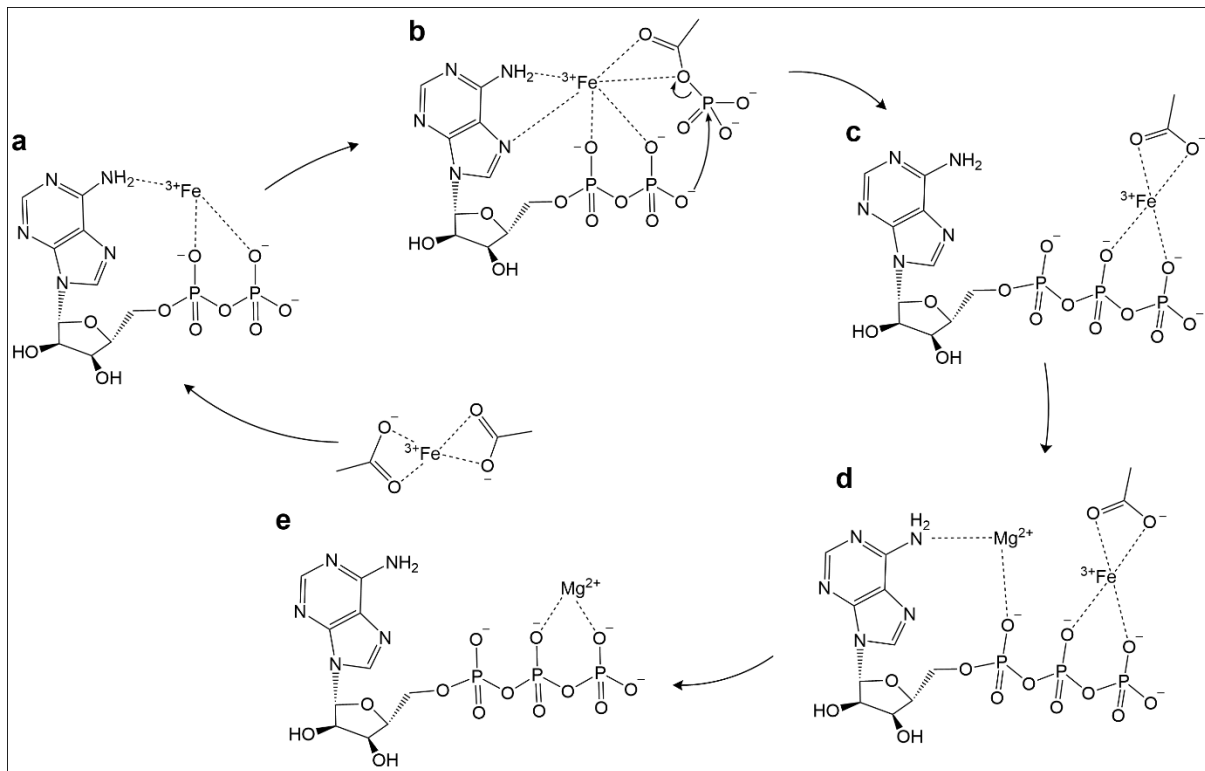

911

912

913 **Figure 6 – Potential mechanism.**  $\text{Fe}^{3+}$ , stabilised by the 6-NH<sub>2</sub> and N7 groups on adenine, interacts  
914 with the dianion of ADP, lowering the  $pK_a$  of the outermost OH group, enhancing nucleophilicity.  $\text{Fe}^{3+}$   
915 interacts with the oxygens of a molecule of the surrounding AcP, bringing it close enough to facilitate  
916 the phosphate transfer.  $\text{Fe}^{3+}$  then moves from  $P_\alpha$  to the  $P_\beta$  and  $P_\gamma$  of ATP and ultimately abandons  
917 the ATP chelated by acetate groups facilitated by the favourable association of  $\text{Mg}^{2+}$ .  $\text{Fe}^{3+}$  is then  
918 available to catalyse another phosphorylation of ADP.

919

920

## Pinna *et al.* Supplementary Information

921 **SI Figure 1**

922

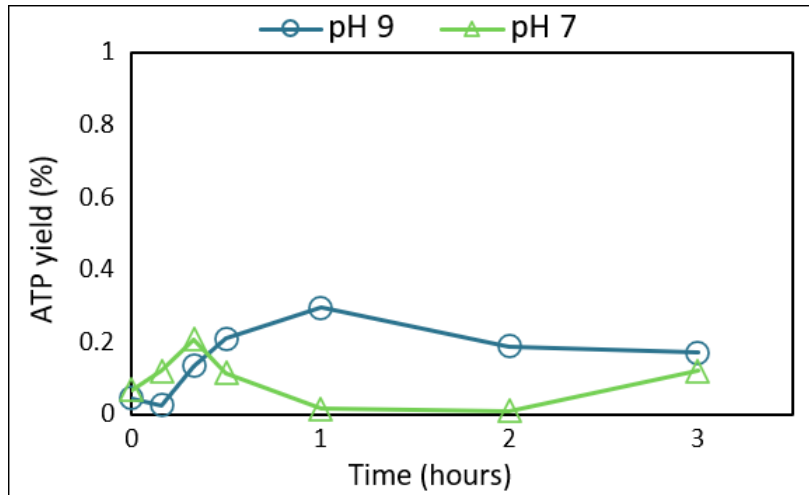

923

924

925 **SI Figure 1** – Comparison of the ATP yield from the reaction ADP (1 mM) + AcP (4 mM) at 30°C in a FeS  
926 clusters-rich 10 mM bicarbonate solution at pH 9 (circles, teal) and 7 (triangles, green).

927

928



929 **SI Figure 2**

930

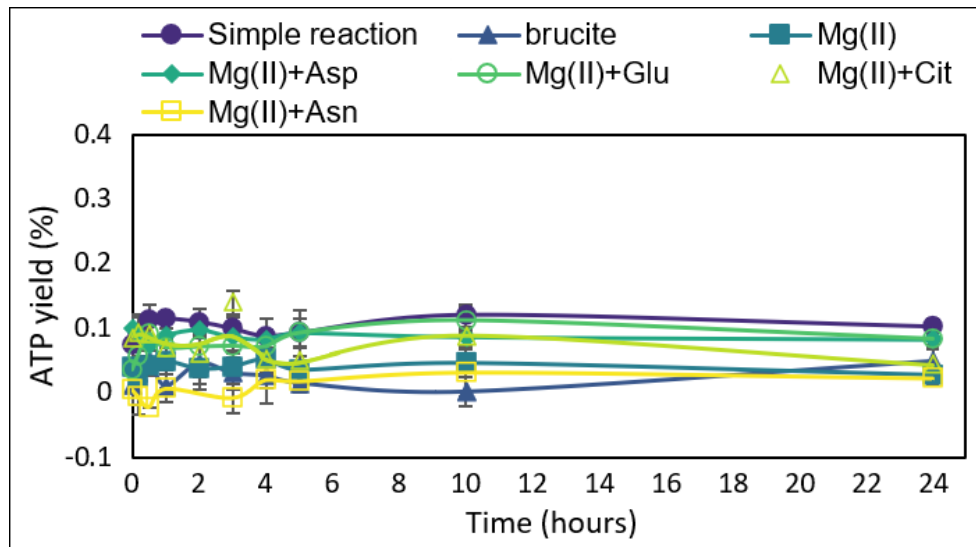

931

932

933 **SI Figure 2** – Comparison of reaction ADP (1 mM) + AcP (4 mM) at 30°C and pH ~5.5–6 with different  
934 forms of magnesium (ionic form and mineral form brucite) coordinated by citrate or amino acids. N =  
935 3 ±SD. Brucite is a hydroxide mineral (Mg(OH)<sub>2</sub>) with a unit structure reminiscent of the Mg<sup>2+</sup>  
936 coordination by aspartate in enzymes such as Mg<sup>2+</sup>-dependent RNA polymerase.

937

938 **SI Figure 3a**

939

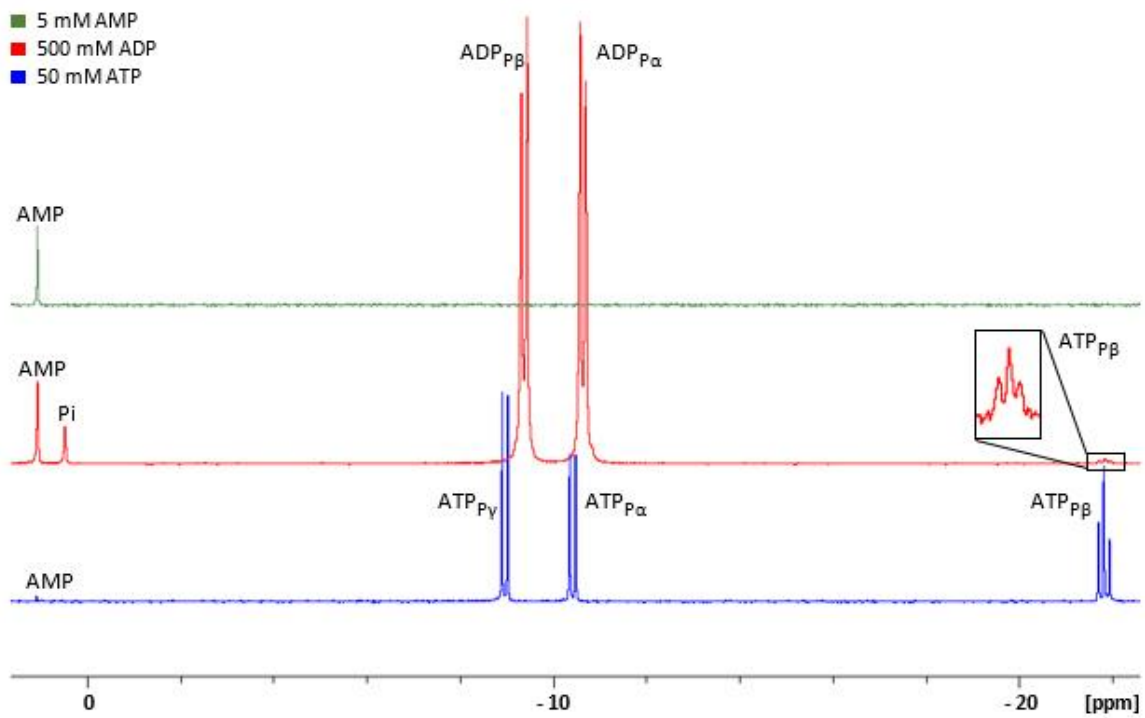

940

941

942 **SI Figure 3b**

943

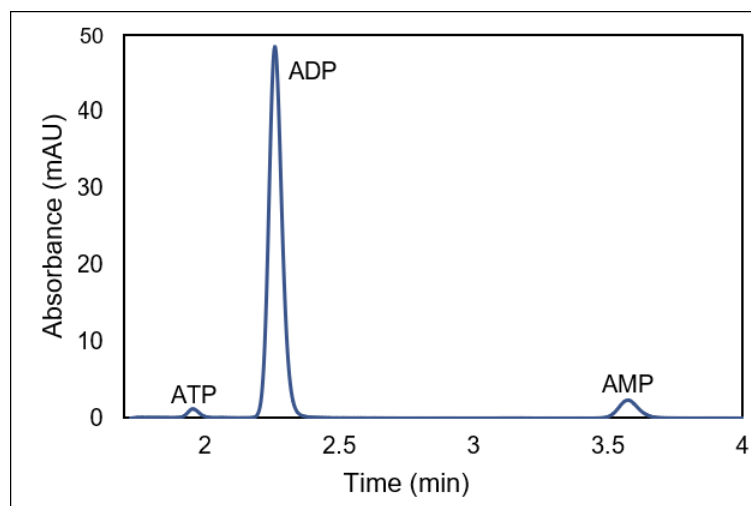

944

945 **SI Figure 3** – Residual levels of ATP present in the ADP commercial standard. (a) Comparison of <sup>31</sup>P-  
946 NMR spectra of commercial AMP (green), commercial ADP (red), and commercial ATP (blue); the  
947 graph insert shows a zoomed in area of ATP signal. (b) HPLC chromatogram of commercial ADP  
948 (1mM). All peaks labelled for clarity.

949 **SI Figure 4**

950

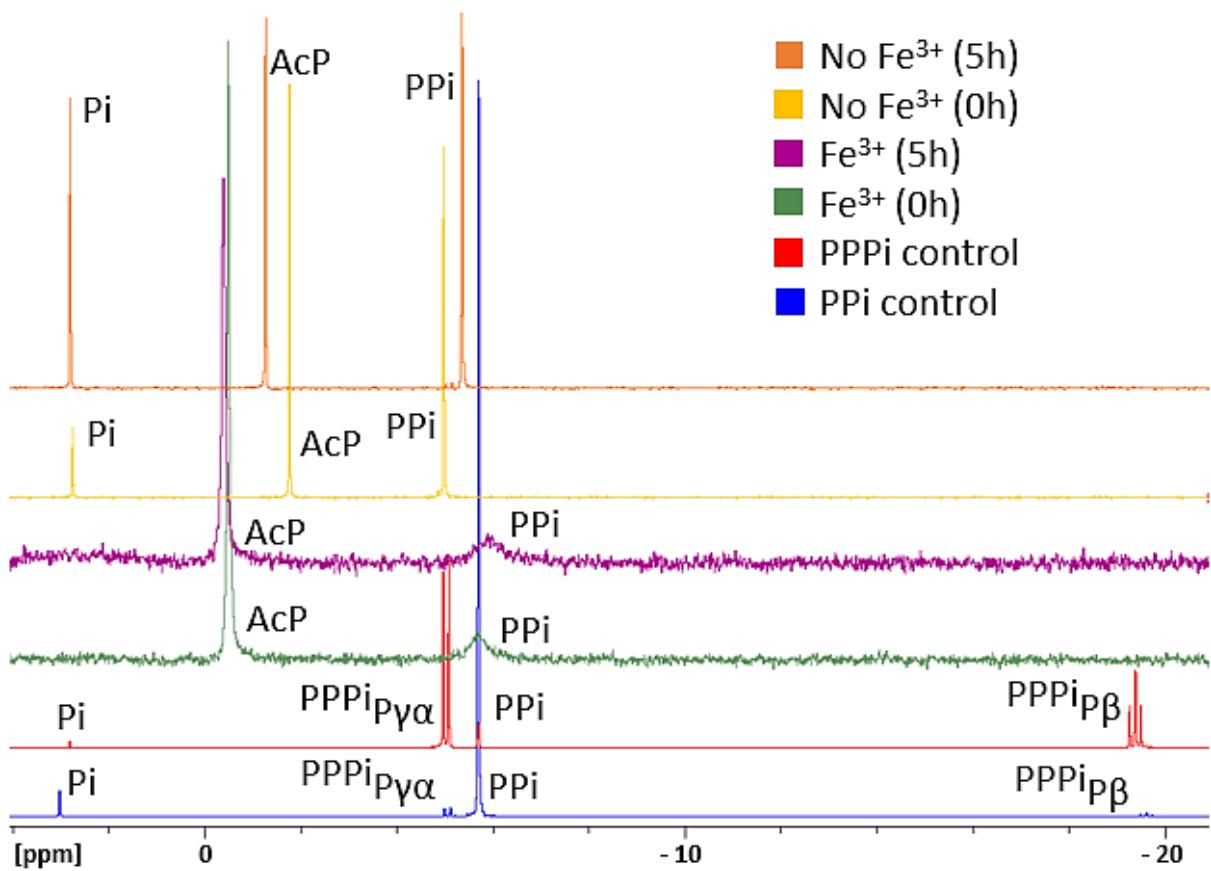

951

952

953 **SI Figure 4** – Comparison of <sup>31</sup>P-NMR spectra of the phosphorylation of PPI by AcP in the absence  
954 (orange and yellow) and presence (purple and green) of Fe<sup>3+</sup>, commercial PPPi (red), and commercial  
955 PPI (blue). All peaks labelled for clarity.

956

957 **SI Figure 5**

958

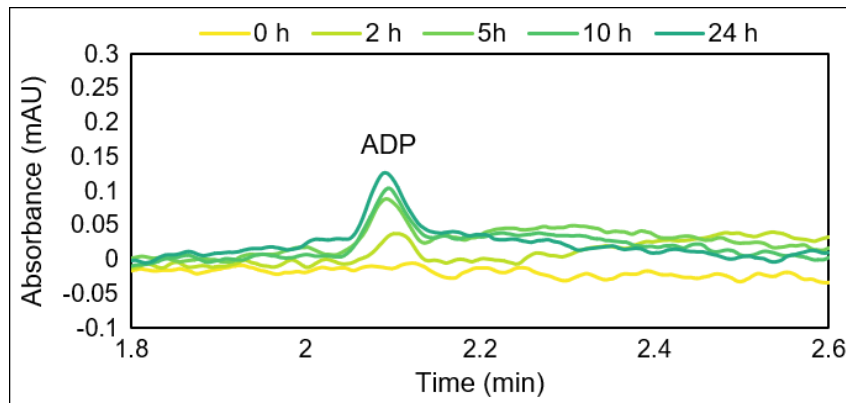

959

960

961 **SI Figure 5** – HPLC chromatogram showing the progressive ADP synthesis over 24 hours via  
962 phosphorylation of AMP by AcP in the presence of Fe<sup>3+</sup> at 30°C.

963

964 **SI Figure 6**

965

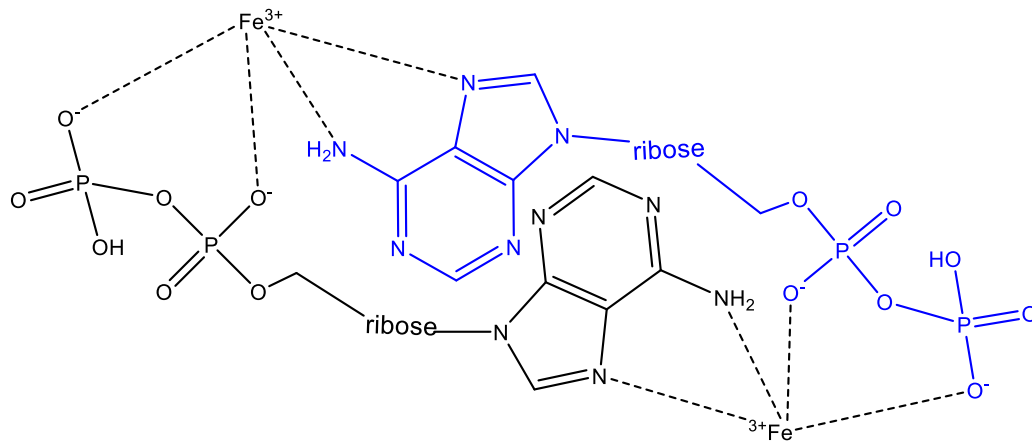

966

967

968 **SI Figure 6** – Possible stacking of ADP coordinated by  $\text{Fe}^{3+}$ .

969

970 **SI Figure 7**

971

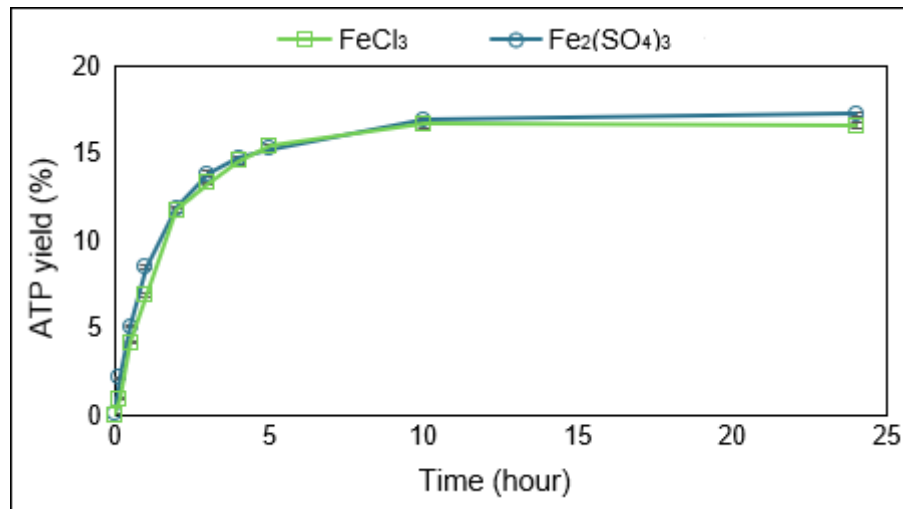

972

973

974 **SI Figure 7** – Comparison of the ATP yield from the reaction ADP (1 mM) + AcP (4 mM) + Fe<sup>3+</sup> (0.5 mM)  
975 at 30°C where the Fe<sup>3+</sup> is given by either FeCl<sub>3</sub> (squares, green) or Fe<sub>2</sub>(SO<sub>4</sub>)<sub>3</sub> (circles, teal). N = 3 ±SD
